# Supplementary material for: Analysis of Mammalian rDNA Internal Transcribed Spacers
Source: PubMed Central journal article supplement (PMC3834078; doi:10.1371/journal.pone.0079122), 2013-11-19
Supplement: pone.0079122.s001.pdf [file pone.0079122.s001.pdf]

-----  
-----  
-----  
CGCCG-GTCCCCTCCC-----CCGCCTCCTCGTCC-GCCCC-----CCCGCCGT-  
CCAGGTACCTAG----CGCGTTC-CGGCGCGGAGGTTTAAAGACCCCTTGGGGG-----ATC-  
GCCCGTCCGCC--GTGGG-TCGGGGGCGGTGGT-GGGC----CCGC-----GGGGGAGTCCC-----  
GTCGGGAGGGGCC-----  
-----GGCCCC-TCCC--GC-----GCCTCC-  
ACCGC-----GGAC-----TCCGCTC-----CCCGG-----  
CCGGGGCCGCGCCGCC-----GCCGCCCG-CGGCGGCC-  
GTCGGGTGGGG-----CTTTACCCGGCGGCC---  
GTCGCGCGCCTGCC-----  
-----GCGCGTGTGGCGTGCSCCCGCGCCGTG-----GGGGCGGAACCCCC-----  
GGGCGCCTGTGGGGT----GGTGTCCGC---GCTCGCCC-----  
CCGC-----GTGGCGGC--GCGCGCC-----TCCCC-GTGGT-----  
GTGAAA-----CCT-TCC--GACCCCTC-----TCCGGAGT-----CCGGTCCC--GTTT-----  
GCTGTCTC-GTCTGGCC-  
GGCCTGAGGCAACCCCTCTCCTTT-----  
-----GGGCGGGGGGGGGGGGACGTGCCGC-GCC-  
AGGAAGGGCCTCCTCCCGTGCG-----TCGTCGGGAGCGCC-----CTCGC-----  
CAAATCGACCTC--GTACGACTCTTAG

PanA

GGAAGGATCATTAACGGAGC-----CGAAGGGGGGCGGAGGCC-  
GCGGCGGC-----GCCGCCGCGCTTCCCTCCCC-----  
CACCCCCGCCACAACGCGGCGGTGCGGGGCGGGGCCCGT---GTGCC---  
GTTTCGTT-----  
GTTTCGTTTCGTTTCGCTGCCCGCCCCGCCGCGC-----AGAGCC-GGAGGAC-----  
TCGGGAGGGCGACG--TGGGGGGAGAGC----GAGAGAGACG--GAAAGAAGGGG-GCGCG-  
TGTTGCGGTGCGC-GTGTGC--CGGGCCGGCGGGC-----  
GGTGGGCGGGGAGCGGTCCCCGCCGCGG-CCCACGACGTGTGTGTCGGCGGGCGCGGGG-----  
CGGTTCTCGGCGGCGTCACGGCGGGTTTGGGGGGGGGTCTC-----  
-----  
GGTGCCCTCCTCCCCGC-----CGGGGCCG--TCGTCC--  
GGCCCCGCCGCGCC--GGCTCCCC-----GTCGTGGGGCCGGGCCGATTCCC---  
GTC-----GCCGCTCCGCCGCG-----CGCCGCTCCGCC-CCGGCACGG----CCCCGCTCGCTCTCC-  
CCGGCCTTCCCG-CTA-----GGGCGTCTCGAGGGTCG-  
GGGGCCGGA-----  
-----  
-----  
-----  
-----  
-----

-----  
-----  
-----  
-----  
-----  
-----  
-----  
-----

CGCCG-GTCCCCGCC-----TCCTCGTCC-GCCCC--CCCCCCCCGCCGT-  
CCAGGTACCTAG---CGCGTTC-CGGCGCGGAGGTTTAAAGACCCCTTGGGGG-----ATC-  
GCCCGTCCGCCC--GCGGG-TCGGGGGCGGTGGT-GGGC---CCGC-----GGGGGAGTCCC-----  
GTCGGGAGGGGCC-----  
-----GGCCCC-TCCC--GC-----GCCTCC-  
CCCAC-----GGAC-----TCCGCCC-----CCCGG-----  
CCGGGGCCGCGCCGCC-----TCCGCCGGTGCCGCGGTTCG-CGGCGGCC-  
GTCGGGTGGGG-----CTTTACCCGGCGGCC--GTCGCGCGC-----  
GCGTGCCGCGC-----  
GCGTGTGGCGTGCGCCCCGCGCCGTG-----GGGGCGGGAACCCCC-----GGGCGCCTGTGGGGT-----  
GGTGTCCGC--GCTCGCC-----CCTGC-----GTGGGCGGC--  
GCGCGCC-----TCCCC-GTGGT-----GTGAAA-----CCT-TCC--GACCCCTC-----  
TCCGGAGT-----CCGTCCC--GTTT----TTGCTGTCTC--TCTGGCC-  
GGCCTGAGGCAACCCCTCTCCTCT-----  
-----GGGGGGGGGACGTGCCGC-GCC-AGG-AGGGCC---  
TCCCGGTGTG-----TGTGTGGGAGCGCC-----CTCGC-----CAAATCGACCTC--  
GTACGACTCTTAG

PanB

AGAAGGATCATTAATGGAG-----CAAAGAGC---AAGGCTT-----  
GGTGT-----GCCGCCGTGCCTCCCTCTTCGGCTGA-----CCGTGTTTCCCC-----  
ACTGCGGTGC-TGCACGGGTGGGGCCC-----  
TTGCCATTA-----  
GTTCGCTGCTCAGCCCTGCTGGCCGTG-----AGAGCC-GGAGAAC-----  
TCGGGAGGGAGA----TGGGGGAGAGGGAAG-----  
GTGTGTGTGTGTGTGTGTGTGTCATGTTG--  
TGGGGCTGGCTGGCTGGCCTGGTGGAGTGGCTGGGAGTGGTCCCTGGTTGTGG-CCCC----  
GATGTGTGTGTCCGTGGGTGCGGAGG-----TGGTTCTCGGCGGCGTCACGGCGGGGTTGGT----  
GGGTCTT-----

-----GGTGCCCTACTCCCTGC-----  
TGGGGCCCG--TTGTCT--GGCCCCACCC--GCT--GGCTCCC-----GTC---  
AGGGCTT-GCCGATTCCC--ACCGCCCGCGTTGCCTCCGCTGTG-----  
CCACTGGGCCCGG-----CCCCTTGCTTCC-CTGGCCTTCTTG-  
CTA-----AGGTGTCTTGAGAGTCG-  
GGTACTGGT-----

-----  
-----





CGGATCTCGGCGGCGTCGCGGCGGGT-----  
CGGGGGTCTC-----  
-----  
-----GGTGCCC--TCCCCG-----  
CGGGGCCCG--TCGTCC--GGCCCCGCC--GGCC--GGCTCCC-----GTC--  
GGGGGCCG-TCCGGGTTCCCGCCGTCGTGCC---GCCTCCGCCGCGCCG--  
GCCGCCCGCCCGCTCGCTCGCTCGATCGCTCGCTCTCC-CCGGCCTTCCCG-  
CTA-----GGGCGTCTCGCGGGTCC-  
GGGGCCGGA-----

CGCCG-GCCCCCCC-----TCCTCGTCC-GCCCC-----CCACGCCGT-  
CCAGGTACCTAG---CGCGTCC-CGGCGCGGAGGTTAAAGACCCCTTGGGGG-----ATG-  
GCCCGTCCGCC--GTGGG-TCGGGGG---GGT-GGGC---CCGC-----GGGGGAGTTCCC----  
GTCGGGAGGGGCC-----  
-----GGCCCC-TCCCC--GC-----GCCTCCCTC-  
GC-----GGAC-----TCCGGCCC-----CCCCG-----  
CCGGGGCCCGCGCCGCGC---TCGCGTGC-----CGCCGTGACGCCGCGGTCCG-CGGCGGCC-  
GCCGGGTGGGG-----CTTTACCCGCGGCC---  
GTCGTGCCGTCGCGCGGTGC-----  
-----CGCGCGGGCGTGTGTGT--GTGCCCCGCGCCGTG-----GGGGCGGGAACCCCC-----  
GGGCGCCTGTGGGGT---GGTGTCCGC--GCTCGCCCC-----  
CGCG-----TGTGGGCGGC--GCGCGCCTCC---TCCCC-GTGGT-----  
GTGAAA-----CCT-TCC--GACCCCTC-----TCCGGAGT-----CCGGTCCC--GTTG-----  
CTCGTCT--GACTGGCC-  
GGCCTGAGGCAACCCCCCTCC-----  
-----GGGGGACGTGCCG-CGCC-AGG-AGGG---  
CCTCCCGGTGC-----GTCGGGGGCC-----CTCGC-----  
CAAATCGACCTC--GTACGACTCTTAG

Microcebus  
GGAAGGATCATTAACGGGA-----GAAGCCC-GCGCGGGGTTCG-----  
CTCGCGTGG-GCC--GTCCTTT-----





GGCCTGAGGCGATCTCCCCGCGCCTTC-----  
-----GGCGAGGGGGGAAGTGTTCGC-GCC-AGG-GGGG---  
CCTCCCTCC-----GTGGGG-----GCC-CTCGC-----  
CCGAATCAAATCTC--GTACGACTCTTAG

Otolemur

GGAAGGATCATTAACGCTGA-----CGGAGGCACCGCGAGCCGGT-----  
CTCGGCCTCGCGCGCGCTTCTTTCC-----  
TTTCTCCACCTTCCCGTGCGGTG-----CGGGCGGGGCC-----  
GGTGCC-----  
GCGCCGGCCCCGCTGGCCGCC-----AGCAGAGCGATCCCGCAGCGGGTC---  
TCGGAA-----  
GGGAGGGGTGGGTGGTGCCTGCCTGCCTGC---GGAAGGAGGGGGTGTG-----  
GCGCGTCAAGCCCGCTCCCCG-GGATCGGGCCGCTCCCGCT---TGGGG-----TGG-----  
TCACGGCGTCGAA---  
GGGGGGCCTCTCC-----

-----GTGCCCCGCCCTGCCGGTCCCCCT-----  
CCGGGGCCCG-----CCT-GGTCC-----  
CGGGCCG-----GCCGTC-----TGG-----CCGTGCC-----  
GCTGACGTCTTTCCTGCCGCCGCCGCCGCCGCCCTTCCCCCTCC--CTC-----  
GCCCT-----GGCGTCTCGAGGGTCG-  
GGGTGGCCGCCGCGCGCCGAGTCCCTCCGACCCCTCTCCCCACCCCGCCCTCACTGTCACCCC----  
GTCTTTGCCGGTCCC-----  
GGCCGACCTGCGGGGCAGGGCCCTTCGGC-GCATCT--CGGGCCGCGTGGCGGTGGC--  
CGGCGGTGCCCTCGCGGAGCTTCC-----CCCGA-----  
GGGGGTGGCCCTGCCGTTGGGACCCGCCGCTCCCGCCCCGCGCG----TCCCG--CCTCCC--ACC--  
CTGGACGGATTCCGTTCCCCGCCTCCCTCCCTCGCCCCGCCGCGCC-----

-----  
TCACCCCCACCTCGGCCGCCGGTC-----  
-----TCC-----  
TGTCGGCTGGGTGGGTCGT-----

-----  
GGTGGGTGGGGCGGGTTAGGCGGAGGGACGGGGGGAGGGGGGTGCCGGTCCCCGTC--GCGGGCGGGTA-  
GCGC--CGTCGGGACCGTGTCCC-----  
GTGGGGCGGCCGGG-----CTGGGGCCGGGGGGGTGTGGCCGGTTC-  
CGGGGGTTGGGTGGTTGGGTGCGGGGGGTTGCGCCCTGGCCCGGCCTTTTCCCTTCCCCGTTCC-  
GCCC-----TCCTGT-CCAGGTACCTAG---CGCGTTC-CGGCGCGGAGGTTTAAAGACCCC-  
TGGGGG-----CTC-GCCCGACCGTCC-CGTGGG-TCGGGGGC---GTC-GGGC---CCGGCGTCGTT-----  
GTGGGGGGTTG-----TGCCGGGAGGGT-  
CGG-----  
CCTCGTT-----CCGGCTC--TCCC--GTCCC--  
GCTCTCCCGC-GCGCTC-GGAC-----TCCCACGC-----

CCCGGTGC-----CCGGGTTGCGGCGGCG----GCGCG-----  
CCCGGGCCGCGGTGCGCCGGCGCC--GTCGGGAGGGGGCTGACC-----CCCGACCCCAACCCGACGGCC--  
GTCGTGCCCCGCGGCTCGCGGCGGCTCCGCGCCCCCCC-----  
-----CCGCG----TCGCCGGTTTGGGGAAAACACACTAGGCGCCTGTCGGAACCCCT-----GGGCG-  
CTGTGGGGGC----TCGTCCGC---GCC-----  
TTCC-----GGC----GCGCCGGAC-  
GTCCCCCGTGTTTTTTTTTTTTTTAA-----CC--CT--GACCTTTC-----  
AGAGT-----TTGGTCTC--GTG-----GTCTG-GACTGGCC-  
GGCCTGAGGCGGCCCTCCCTGCC-----  
-----GGGAGGGGTGAGTGTGCG-GCC-  
AGTGGGGGCGCCCCCTCCGCTTT-----GGCGGGGTGGTGGTGGTGCC-  
CTCGCCTTACGGCAAAAAAAAAAACAGCTCT-GTACGACTCTTAG

Tupaia

GGAAGGATCATTAACGGGA-----AAGG----CGAGCCGC-----  
CGCCGTGCGCGCGCGCGCGCT-----  
GAAAGTCTGGT-----CGGGGCCCC---  
GGTG-----  
-----  
GGCCGCC-----  
-----GGAGTCCGTTCTGTTTCTC-----  
GGTGGGAGATGGCGAGAGAGAAGGGTGGGAAGGGTGAC---GGTGGCC-----  
GGGTGTTGTACGCCCGAGGAAGGAGGGG-----CGGTTACGGCGCCGCTGGGAGAGGGA--  
CCCC-----  
-----GTGTCCCCACCC-  
TGCCGGTCCCCCTCCTCC-----  
-----CGGGCCG-----  
CCCCTCGCTGTCGCCGCCCTCTCCGGACCTCT-----  
CCTCCCTCGTGTTCCTGCCTC-----  
GGGGTGGCTCGAGAGTCTGGGAAGGGTTGCGGGGGGGGGGAGGCGCACGGGCGCTTCCCTTCCCTCCTCGCAC  
CCCCTTGCCGCCAGCCCGCGGCGATGCCCTTCGGCGTCGGTCTGCTGCCGTTGGGTCCAGCCCGCGG--  
CGGGACGCCCGCGG--GCCTCT---  
CAGGAGGCGCCGGCGGACGGCAGCGACGATGGCGCGCCGAGG-----  
---CTCA-----GCCACGATCCGCGTCGCCTGCCGCCGTCGCCACCGCC--  
TCCCG--CCGCTC---GCC--  
CTGGGCCGGTGCACCGACCCTCGGTCGTGCCTGGGTCGTCTCCTCGAT-----  
-----  
-----  
TCCCCCGCCCGGTGCTGTCCCGCCTGGCCCTCGGGGGCCACGGTGTGGGGGGGCTGCGTTCCCCCACTCCC  
CCCTCGTCCGGCCGCGCTCCTCTCCCTCCCTC---GCTC--TGAGGTTGGGGGTGGGAGGTCCG-  
TGGTCCGGGTGCGCCGGGCGGGT-----  
-----  
-----  
CGGTCCGTCCGCTGGTCTCGGTGGCGCCCCGTGCG-GTC--ACGGGCGAGCA-GCGC--CGC--

GGACGGTCCCGTAGTCTGGCGGTGCTCCTCCGGTGGGGCGG-----  
CCGGCCGCCGTCGGGTGCTCGTCTGATGTCTGGCGATCGGGG---  
TCGGGGAGTGCGGGGGAGGACGCCGGCTTCTCCCCCACCCTTCTCCTCCCCTCC-GCCC-----  
CCCCTGT-CCAGGTACCTAG---CGCGTTC-CGGCGCGGAGGTTTAAAGACCCC-  
AGG-----  
-----  
-----GGGTCTGG-----TCCATCCCCCCC--  
CCCCGGG-----  
CCGGGGTTGTCGAGCGCGTGTGCGGTGCC-----GCGCCCCGTCG-CGGCGACC-  
GCCGGGAAGGGG-----CTGCCCGGCGGCC---  
GTCGCGGGGCGCGCGC-----  
-----GTGTCCTGCGCGCGGCTCCCTCGTGCCTTCGTTGGGGGGGTGGAGGCCCCC-----  
GGGCGCCTGTGGGG-----TCGTCCCG--GCTCGCCCCG-----  
CTGG-----CGGGTTTGAGGCCCCC-----GGGTGCGCCCCCTGTT-----  
TGGTAAA-----C---TCCT-AGCGCC-----TCGGCCG-----CGGTCTC-  
GGTTTT-----GTCC---GCTGGCC-  
GGTCTGAGGCGACCCCTTCCCCGCTCC-----  
-----GGCGGGGTGGAGGGAGATGTACCGT-  
GCCCTGGA-----GGCGGGGGCTCC-----GGCCCCCAC-----  
CCTTCTCAAACCTC--GTACGACTCTTAG

Rat

GGAAGGATCATTAACGG-----AGAA-GGCCGAGGGGGT--  
CGTGCCCG----TCCCC-  
TCTTGGGCCTGTGTGAGTGTTCCTCCTC-----  
-----TCGCC-  
GGGAGGC-----  
GCGTCCCCGGGTGGGTCCCCGTGTCCGGCGTCTGGCGTCTGGCGCGTGCCGTGGCCGGCCGGCGGAGGGGGT  
TCGGGACAGGTGTGC-----  
GGTGGC-----AGGGTG---TCGGGTCT-GGTCCGCCG-CGGACCT--  
CCTCC-----  
-----  
GTTTTCTCGCTCTTCC-----  
CTCGACGCCTCCGTGCGCCCGCTCCGCTCCGCCGCTGCC-----GTCGGCAGC--  
GAGGGCGTTCTGCCTCTTCCCGA-CCGGC---TCCGTGATCTCGTGTGCACC---  
GGGGTGGTACGTGATCTCTCCGGGCGGTGGCCGGGACGC-----  
GCTCGCTCTCCTCGA-----  
GGCGCCTGCCGCTCC-----

-----  
-----  
-----  
TCCCCCGCCGCGGCTCTCCGGC-----  
-----ACTGACGGTG-----  
CCGGTGGCTCCGCC-----  
-----  
-----  
-----  
-----  
GCGTGCGGTGGGGGGGG---  
TGTGTGTGCCGGTGCCGCGGGTGGCTCGCGCGCCCCGCCGCTCCTTCTGGGCCTCC--GTGTCC-  
GCCCC-----GTCCTGT-CCGGGTACCT-GCTCTCGCTTC-CGGCGCGGAGGTTTAAAGACCC--  
CGGGGGG-----GTC-GCCCTACCGTCCC-CGGGG-TCGGGGGGG-CGGTGGGGC-----CCGT-----  
AGGGAC-----  
GTCGGTTCGTCGCGGGAGGGCT-----  
-----TCCCGTCCCTCCCCGCTCCGGCG---  
CTCCCTC-----AGAC-----  
TCAGCGGCGCACCCCTCT-----  
-----GCC-GCCGGCGC-----  
TCCCCGAGGCGGCG---  
GT-----  
-----TCGGGGGGGCGTGTGCGAGCCCCCTCT---  
GGGCGCCCGAGGGGTTC--CCGGCCCGA--GCGCCT--GGCTGTCCCGCC-----CGTT-----  
GGCGGGCCGCCCGGGTGCCGGGT-CGTGGC-----GTCCC-GTGTC-----CCGTGTGTCCCG---  
CCTTTCCG-TCTCCGACCCTGTCTTTTTTTTTTTATTTTCTTACGTGTG---CCGTTTC-----  
GTTTCGCGCTGGCC-  
GGCCTGAGGCGGAGCCCCCTCGCCGTCGGTCCGGC-----  
CCCTCCCATCCCGCGCAGGAGGGGCGGGCGGGGGCGCTTGTGCGGTCGTC-AGCA----CCCCGTGT-  
GCGGAG-----TTCCGCTCACACCTCAGA-----TAACC-----  
GTACGACTCTTAG

Mouse

GGAAGGATCATTAACGG-----  
GAGACTGTGGAGGAGCGGCGGCTGGCCCCGCTCTCCCCGTCT-----  
GTGTGTGTCC-----  
-----TCGCC-GGGAGGC-----  
GCGTGCGTCCC----GGGTCCC--GTCGCC-GCGTGTGGAG-----  
CGAGGTGTCTGGAGTGAGGTGAGAGAA-----  
-----GGGGTGGGTGGGGTCG-GTCTGGGTCCGTC-T-GGGACCG--  
CCTCC-----  
-----  
-----













-----  
-----GCCGCCTCCTGACG-  
GCCCGCTCTGGACGGTGTTCGCCGTCGCGGGTGGGTAGCGCTGCGGTCTCGCGTCCGGCCGGGGCCGGGGTCCG  
GCGCCGGTCCCGGCGCTTGGCGGCGGGGACGCCCCCTCCCGCGGCCCGAGTGCCTCGTCCCGTCCCC-----  
--CCCTC---CCAGGTACCTAG----CGCGTTC-CGCGCGGAGGTTAAAGACCCT-CAGGGGC-----GTC-  
GCCCGTCCCCCTTGGTGTGTCGGGGGA----GACGGGC----CGGT-----GGGA-----  
GCCGCGGG-----  
AAGG-----  
GCCCGGCCCGACCTCCGCTCCCC-----AGGC-----  
TCCGCCGCCCGCCC-----  
-----CCCCG--GTCGGGGTGCCTGCCGCGT-----  
CCCGCCGCTGGCGGCCG-  
CCGGGAGGGGGTGC-----  
CCGCGCGTCCCTTAGCGGCGGGCGTGTGTGCCGCTCCGCGCCGTCGGTGGTGG--  
TGGGGCTGGTGGGAACCCCC-----GGGCGCCTGTGGGGCCC----GTTCCGT---GCGCCCC---  
GCCGCGC-----CCCGG-----TGCGG---TCCTGCGGC---GCCGGGCGA-----GCCCC---  
GTCGTGG-----AAAA-----CCCCTC---GACCGCCACTGCGTTTC-----TG---  
TTCTGGTA-----CTCTTGCGTGCTTGGCC-  
GGCAGAGAGGCAAGCTCTCTCTCTCGCCCCGCTTCCCCGCCCC-----  
GTGCCGCCCGTGCGGCGGGGTGGGGGGGCTGTGGGGTGGGGGGGAAGAGCCGGTGCCG-CGCC-  
AGGACCAGCGGGACGAGGG-----  
CCCCTCGCGGCCCTCCTTCCGAAACCTC--AT-----

Ocho

GGAAGGATCATTAACGAGGAC-----CGCCCCGCCGCGTCTGGCGTGTGGC-  
GTGTCGGCGACC-----  
-----  
TGCGCCCGGGGGGAAGGAGGAGCCGTCTCTCTCGGTGCCGGCGGGCG---CGGGATCTTACC---  
GGGGACGTGGGGCGGTGAGCCGCGCGGCGGCGCTGGGCGGTGGCGGTGGCGGT-----  
-----  
GCCCCCGTCCCCGCCTC-----  
-----GGGGTGG-CGTCC-----  
GGGGGCTGGCCCCCTCCTCCCCGCGT-----  
-----GCCTCCTC-----  
GGGGGCGCCGCTTGGGGGAGGTTCCCCCGCCGCGCCTCGGGGTGGGGCTCGGGGGGACTGGCAGCGTTGGC  
CGGCCGGCCGGTGGTGTGTCGTGCCCTCG--CTTCCCCTCTTCCC-----  
TCCCCGCCCTCGGCCGGGGTGTCTCTCTTGGCCCCCGCACCTCCCCTGTGTCTCGTTGTTGGCCTGCCG  
GGGGGAGCGGAGGCGGGCCGCGTGTGTGCGCGCTCGAAGGGAGCGCGAGGTGGTGGTGTGCCGTGCCCTGTGGG  
GCCGTGGCCGGCGGGCC-----  
-----  
-----

-----  
-----  
TGGCTTGCCGAGGCGTTGGTGGTGGCGGGCGGCGGTGCCGTCTCCGGGGCTGTGTGCCGTGCC-----  
-----  
TCCGTCCGGCTCCGGCGTGCCCGTCTCGAACCTCCGGGCC-----  
-----CCCCTTCCGT-----  
GGTCCGGGGCGTGGTGGCCGAGCCCGG-----  
-----  
-----

-----  
GGAGGCTTCTGGCGTCTCAGCCCCGTGTGGGGCTCCTCGCCCCCTTCCCAGCCCTTGCCTCGCCTTGCTGTGC  
CGCGGGCCACGGCGGCCCGCCTCCCCCTACCGCCGGCCTCGGCCACGTGTGTCTCG-----TCCTGG-  
CCTCTCCTCTG---GCT-----TCTCTTGCT-CCAGGTACCTAG---CGCGTTC-  
CGGCGCGAGGTTTAAAGACCCC-CGGGGC-----TAC-GCCCTTCCACCC--TGGGG-TCGGGG----TGG-  
TGGGC----CCGT-----GGGGAG-----  
TTGGGGCTTGGGGGGGTTC-----  
-----

AGCCTCGGCTGTCCGCCCTTGCCGCTTCTCCTCCT-----GG-----  
CTCCGCTCCCTTGCCCTGGCCTGTTGTCCCTCCTCCCTCCACCTCGCCCGCCTCTCCCCTACCCCCGTCCCG  
ACCG-GTCGGGGGGCGTGCGCCTTCCCCCCCCACCC----GTCGGCGTTGGTCTCGTC--  
GTGGTGGTTCGGCCACCCGTGCGGGGGCAGCGCCGGTGGGAGGGAGGGCTGTGGCGTCGCGTTCCCCCGCGCCG  
TGCC-----  
CGGGGAGGGGTGGGTGGCCGGCGGTGGGTGCGTGGTGGTGGGGTTGGGTGGCGGGCGGGGCTTCGGGGGCGGGA  
GCCCCCT-----GGGCGCCTGTGGGGTG-----CGTCTGC---  
GCGT-----CAGA-  
CGCGCCCC-GTGTGC-----AAACCCA-----TCC--  
GGCCCCGCCAGTGT-----CTGGTT---GTCGTTTCG-----AGTCTGCC-GGCC-  
GGCCTGAGGCAACCCCTTCCCCTCACC-----  
-----GGGTCGGGGACGGCGCCGTGCC-TCGC--  
AGCAAC-----  
GTTCAAGAACTC--GT-----

Orycht  
GGAAGGATCATTAACGA-GAC-----CGGGCTTGGCCGG----CTGGCCGTGCC-  
TGCCTG---  
ATTCCG-----  
-----  
TGC-----  
-----CCGGGGGGAAGGA-GAGCCCAGAGAAGGGAGTTCCTCCCCCCC-CCTCCTCT--  
GGCGGGCGGTGTGAGGGTGGCTCGGGGAGTCGCCGGGATTGTGGCGAGGAGCGTGCGGT-----  
GTCGCGGACCGGTTGCGTGCGTGGGGGGTCCGGACCCTCCCCCCTCCTGCGCGTGCTCGGTGGTGACCGGGG  
TCTGGCCGCCCTTGCGGTGGAGGGCCACGGGCGTCTCCCTGGAGGAGAGGCGAGGAGGGGTGAGGCCGAGAG  
GCGTGTGGCGTGTGTGGTGTGTGTGTGGTGGTGGGAAGAGGCGCTGGGGGGGGGGCGGTGTGCCGCTGGCGGT  
GGTGACGGGGTGTGGGGCGTGTGC-----TGGTC-----  
GCGCGTCTCCCCCTCGCCGTCTCGGGCTCCGCTCCCTTGCTCCTCTCGCCCCCTCCCCCACTCCATGCCGCTG

CCACCTCCCCCGCCCCTCGTCTTGTCTCTCCATCCCGGGGCCCGTCATCCCTCTCTCCGTTGGAGGCCCGGCC  
GCCCGGAGCCACCTGGGCGCGGAGCAGGGAGGAGGAGGTTGTCCCTCCCACGCACGCCTCGGGGCCGTGCG-  
CGTCTCCCGCCTTTCCCTCTCCCCCTACCCCTTCTG-----  
CCGCACTCTCTACCCCCAACTTCGTGGCGTCCCGAGAGGGCCTCGAGGTCTGTGTGTGCTTGTGCTTGGCGAT  
GGGGGTTGTTGGGGGTGGA-----  
-----  
-----  
-----  
-----  
-----

CGAGGGGGCGTGTGCCGTGCTGCCGCGTGGCCGTGGCGGTCCGGGTTGGCCGGTGGGGTGCCTCTGGGTGGTGC  
GTGTGCGCCTTGTCCCTCCTTCCGTCTCCGGCG-----  
TCCGTCTGAGCTCCCCGGT-----  
-----CCCCTGT-----  
GGCCGGGGGGCGGGCGTCCGGCGGGGGGGGG-----  
-----  
-----  
-----  
-----

TGTCTGGAGGTGGCCTCGGTGCCACCTCCCGTGCCTCATTCGGTTTCCCCGCCGTCGTCTCGCGCGGGCTTGC  
ACCGCTTCCCCCTCCCCCAACTTCTCC--GCCT-----CTCCT--CCAGGTACCTAG----  
CGCGTTC-CGGCGCGGAGGTTTAAAGACCCC-CGGGGGT---GTACCGCCTGTCCGCCTC--GGGG-  
TCGGGG---CGG-CGGGC---CTGT-----GGGGAG-----  
TCGGGGCGGTCCCC-----  
-----TCCCGTCCCGTCCGT-

CCTCCCCCT-----GA-----  
CTCCGCTCCTCCTGCCCGGCCGAGG-----  
CGGGGGCGCTCGCTC-----GCGCGCCGCGCAGCCTCTCGCGGCGGCTGCC-  
GTCGGGAAAGGGGCGC-----  
-----

CTGACCCGGCGGTGGTGTGCTGCCGCGAGAGGGGTGCGCGCGGGGGCGTCCGTCCTTGTCCCGTCCCGTGTCCG  
GGGGGGCGGGAGCCCCCTT---GGGCGCCTGTGGGGT-----CGTCTGC---GTGCTCGCCC-  
CTCGCCGCGGC-----GGCGGCGGCGGCGGAGGC-GGCTGGC---GCCGGG-CGCGCCCC-  
GCGTC-----GAAACCCA-----CCGACCCCTCCCAGAGT-CTTTC-----  
ATTGTGTCC-----AGTCTACT-GGCC-  
TGCCCCGAGGCAACCCCTTCTTCT-----  
-----GTGGGTAGGGGATGGTGTG-TGCC-AGG-----  
CTTTCCTT-----GACGGGAAAG-  
AGCCAAAAAACCTC--GT-----

Dasypus  
GGAAGGATCATTAAC--GAGA-----GGAGCGCCGGCG----AGGCGCC-----  
CGAGCCTGCGTTCGGGCCCGGCCGAGCGTCCC-----  
GTTTTTTGCCCGTGC GGCG-----CGGGC-  
GGGCCGGCGCGGTGGCC-----  
-----GGCCCCGTGGCCGCGA-----GAGAGAGCGAGAAGCC---CGC---





TGCGCACCCCC-----GGGCGCCTGTGGTGG---CGGTGTC--A---GCCCCCGCGCCCGCCCTC-----  
CCG-----GGGGCGAG-TGCGTCGGGGGAAGGCCGCCAC-----  
CGGT-----CCA-TCCC-GACCCTGC-----TCCGAGT-----CTGTTT-  
TTCGTTTCCT-----CTGGAC-  
GGCCAGAGGCGCCCTCCTCCG-----  
-----TGGGGGAACGTGCCGTTGCC-  
AGGTGG-----TTGAAGAG--CAATTC-AA-----  
AAAAAAAAGAACGC---GTACGACTCTTAG

Echinops

GGAAGGATCATTAACGGAGG-----CGCGAGCCGGGAGGCGCCTGCGCGCG--  
CGCGCGTGGTGC GTTCTCGGCCGCGAGCCC-----  
GACCCCGAGCCGGCGGCG-----CTCC--  
GATG-----  
-----CGCCGCGAGCCG---GAGAGAACGATAGA-----CGCGC-  
GCGGTGCGTC-----  
TGGGGTGGGGCGCGGGCCGGTGC GGCCCGCGGCGGTGACGGTCCGGGGCCCCGTCCCCGGTTCCC-----  
-----  
CGGGCGGGGCGGG-----  
-----  
-----CCGCC-----  
GTCCGCTCCGCTCCGGGGCCGGTGC GGCTCCC-----  
-----  
TCGCCGCTGCCGTCGTCGCCGTGGCCGCCGCGCCTC-----  
TTCTCGCCGCGAGGCGAAGCGGGGGGCGGAGTGC GTCCCCCGGCCCTCTGGCGCCGGCGCCC-----  
-----  
GGCCACCCGCGTGTTCCTCGGGCTTCGCCGGCCCCAGCGGT-GCGTCT--CGGGAGGGG--  
GCGGCGCGGCGTGGCGGTTGTGGGGTGGGGGCGC-----  
GAGC-----GCGTCCCTCTCCTCCTCCGCCGCGTCTTGCGTCGCCGCC--TCCCGC-  
CCTCCT--GTC--  
CTGGGCTCGCGTGGTGTGCTGGTTGCGGGGTGGCCTCCCCGCCCTTGTGCGGTCCCGCCTCCGTCTCGGCCTC  
GTCGCCCTGGCTTGTGCCCGGCCGTCCGTCTTCCGCCTCTCCTCCCCTCCCGTGTGCTTTCCCCCCCCACCAC  
CACGCTTCCCACTGTCCCCCTCCGCCGATCTCTCTCCCCGTGGCACCTTCCGGGTCCCGGTGACCGGCTCCTCA  
CGCGCCTGCTCGTCCCGAAGCCCCGCGTGGTCCCTCTGTCGC-  
TCCCGCCGGCCCCT-----  
-----CAGC-----  
GGCGCCGGCGGGGGGGCCCTTGGGCCGCGGGTAGCGAGTTAGGTGTGGTGGGCCGTTGCGGGGGACCTCTCG  
GGTCTGGGGTGAAGGCGGTGCGGGCAGCGTTGGGGCCCTCTGAGGTGGGGGAGGCCGCGCGGTCTGGGATGGA  
AGATGGCGCGCGGGTCCGGGCGTGGCCGGTGC GCCGGGTGCGACGG--  
GTGTCCCGGCGACGGCAGCGTTGGGGCCCGCGGGGTTGGGGGATCCCTCCGCCTTCTCCTCGCTGTC--  
ACGGGCAGGC-CGC---  
GCTGCGGCGGGTCTCGGTGTCTCCTCGGCGGGGACGTGGGCTGCG-----  
ACTGAGGTTCCGGCTCAGGAG-----  
--CCCGGTGGCCGTCTGCCGCCCTCCTCTGCTCTGCC-----ATCCTGT-CCAGGTACCTAG-----  
CGCGTCC-CGGCGCGAGGTTTAAAGATCCT-CGGGGGT---GTC-GCCCGTCTGCCT---CGGT-





AAACCGG--GTCG--  
TCCCGCCGTCGCCCGGACCC-----  
-----TCCGCGGC-----CAGGGGCCTGGGCGCGCGGGT-  
GCGGGGGGGACGGTGGCCGGCCTCCGAGCGCGCCCCGTGTGGGTCGTCGCGGGGGTGAAGGGAAGAGGAGGG-  
-----  
CGGTGTGTGCGTGTGCGGCCGGGAGGTGGGGGAGCCGTAGGCGGGGTGGGCGGCCGCGCGCTGCGGGCGGGCGGG  
TCCCGGTGGCGGCGGCGGGGGGGCGCGCGTGGGCCCTACCGTCCATCCCCCGCGTC--ACGGGCCGGCA-  
GC---GCCGCGGTCCGC-GCGTCCCCCGGGGCGGCCGCGGCC-----  
GGGGATCC-----  
GCGTCGGGGG-----  
CGATGGCCGCGCCCCGCCCTCGCTC-GCC-----ACCCTGT-CCAGGTACCTAG----CGCGTCC-  
CGGCGCGGAGGTTTAAAGACCCT-CGGGG-----GTC-GCCCGTCCGCC---GCGGT-TCGTGG----CGG-  
CGGGC---CCGC-----GGGAGCGGCC----  
GTGGGGGGGGCCTGGC-----  
-----  
CCTCACCCCGTCTCTCCCC-----GGCC-----TCCGCCCC-----  
CAGGC-----CGGGGGCTCCGC-----  
GCCGCGCCCCGCTGCC-GGCCGGGCGGCC-GCCGGGAGGGGA-----  
GCCCGCGGCCG--  
GTCGG-----  
----ACCGCGCGGGCCCGCGCGGGGCGCCCCGTGTCG----TTGGGG--TGGAACCCC-----  
GGGGCGCCTGTGGGG-----CGTCCAG--GCCCGTCC-----TCCG-----  
GGGGCCGGGTGT--GGACGG-----GCCCT-TGTCC-----GCGAAT-----CCC-  
TCCC-GACCTTTC-----CCGAGT-----CGTGG-TTC-CGTCGT-----GTCTT----  
TGGGCGGGCAGGAGGCGCCCCC-----  
-----GGGGATGTGTGCCGT-  
GTCCAGGGCGGGGTGCGCTCCCTCCCTCCTC-----  
GCTGGCGGGGGGAGGGCCCCGC-----GAATCCAAACTC--GTACGACTCTTAG

Procavis

GGAAGGATCATTAACGGA-----  
CGAGAGAGGCGTGCCGGCGGGGGCCGCAACCCCCACGC-----  
GGCCGCCGGGATGAAGAAA-----CACCCGCGCGGGCG-----CGGGC-  
GGCC-----  
GGCGCGGTGCC-----  
-GGGCCGTCGCGCTGCC--GGAGAGAGCGAGAG-----CGCGCGTCGGAGGG-----  
CGGGGGACGCGGAGTCCCACGGTTTCGGTCGCGGAGCCGGCTGC-----  
GGCGGCGGCGGTGGCGGC--  
GGGAGGACGGAGGAGGTGGAGGACGAGGGCCGG-----  
-----  
TACGGGCAGGGGTTCCGGGG-----  
-----  
-----CGGT-----  
CCCCCGCCCCGCCCGCCCCCGCCG-----  
-----

CCCCTCTCCCCCTCAACCCCTTCCCCGCTCCCTCCCCGCCCTCCCACCCACCCACCAACCCACCCACCAACCCT  
C-CGCGCGC-----CA--  
GGTGGAGCGGGAGCCGGGCGGGGCGGGGTAAGCGTGCTGTCCCCCGGGCCCC-----  
ACCCTCCCGTGTCTCCGACGCCGATGGCTCCCCGCCTCGCTCGCTCAACCCCGCCG---  
CCCGCCCGCCGGCGTTGACCGTTCCGGCGGC-GCGTC----  
CGGGAAGGTGAGGGGGTTCGGCGCGGTGGCCCCAACC-----  
CCCCCTTC-----GGTTCGGGGGCGCCCGTCGCCAGGAAGCC--  
TCCCGG--CGCC---GGCC--CTGGGCGTCGGGAGAAGA--  
CCCGCGCCCGCGCGTCCCGTCCCTCCGTCCGCGGGGGCCCCCGAGACGGGGGCGCCCTCTCCG-  
CGGCCCTCCGCCCCCTGCGCC-----  
-----  
AGCGGCCCCCGCCGGCCTCCCCGCCCTGCCGACCCGCGCGACCCAG--CGTCG--  
TCCCGCCCGCGCTTCCCCACCCGAG-----  
-----CCCAGT-----GCGGCGGGGTGGGGGGGCCTGGGCC--  
ACGGGGCGCGGGGCGCGCAA-----  
-----  
GGGACGGGGGTGGTCGGTGGCGCGGCCGGCCGCGTTTCGAGGGCGGAAGCCGACGGTGGGGGGCGCCGCGCCCCG  
GGCCCCGGGGGCGGCTGTGGCGCGCGGGCTCCCGGGCTTCTACTCCGTGTC--ACGGGCCGGCA-  
GCGCCGCCGCGTTCGTC-----  
GCGGGCGCCCGCGCCGGCTGCGCGCGGGTTCGGGGAACGCCGCGTCGGGCGTCGGGGGC-  
CGGAGGCCGGGGCGC-----  
GGCCTCCTTTACCCGCCCCGCCCTCGCC-ACC-----ACCCTGT-CCAGGTACCTAG----  
CGCGTTC-CGGCGCGAGGTTAAAGACCCT-CGGGGG-----GTC-GCCCGTCCGTC----CGGG-  
TCGGGG-----CGGGCGGGC-----CCGC-----  
GGGGGAGTAGTAGGCCGTGGGCGGGGAAGGC-----  
-----CGTGTG-----  
CTTTCTTTCCCCCTCCTCCTGCGTCTCTCTCCCC-----GGAC-----TCCGCCGAC-----  
CCCCAGGC-----CGGGG-----  
ACGCC-  
GCCGCG-----  
-----  
---GTCCCCGCGTGCCTGGGCGCCCCACGTGTCTTGGGGGG--TGGAACCCCC-----  
GGGCGCCTGTGGGG--GCCGGCCGG--GCCGGGCCGGCCTCGCCCC-----TCCT-----  
TGGGGCGGG-ACCGGACGG--CCGCCGTTCCCCCG--GTCC-----GCGAGT-----CCT-  
TCC--GACCTCTC-----GGGT-----CTGGAT-CCCGTCGTCT-----GTCTT--CCTGGCC-  
GGCCGGAGGCAAAGGAAACCCCCCCCCCACTTCCCTCCCAGCTC-----  
---GGGAGGGGGCGGAGGGGGGGGGTAAGACACTGGGCCGT-GTC-  
GGGTTTGGGGAGGTCCCCACCGCCT-----GCGCGTGGGGGGACCCTCCC-----  
GAAATCGAAAATC--GTACGACTCTTAG

Pteropus

GGAAGGATCATTAACGAA-----GAAGGCAGCGGCGGCCTTAGC---  
CGG-----CCGGCCGCTCGCCGAGTGCTT-----  
CCACCGACCCGTGCGGCG-----CGGGC-GGGC-----  
GGCGC-----



-----TCTGTGTGTGGGCGGGGAGGGGGATCGTGCCGT-GCC-AGG-GGTTGGG-  
TATC-----TCCCCGCCGAACC--CCCAGGAAAAAAGAAAAAAGAGAAACGCT---  
G-ACGACTCTTAG

Myotis

GGAAGGATCATTAACGGA-----  
GAAGGGGGCGTCCGTCCGTCCGCGTTCGG-----  
TCGGTCGGGTTCGGTGTCTCTTTGGCTTT-----  
GGCGGCG-----  
CGGGCCGGGTTCGGGGCGGCGG-----  
GGCCGCCGCCTCGCCCCCGCCGGTCGCGA-----  
GAGAA-----  
-----  
-----  
-----  
-----  
-----  
-----  
-----  
-----

GGGGCGAGCGG-  
GGGCGCGAGGGGGCCTTCGGGGTGCCCCGTTGCCACGCCCGCCGCCTC-----  
GTGGTTCTTTGTGCCCTCACCCCTGGCCGCGAGAATGCAAGGGCAC-----  
GCGTTGTGGGCGTTCCCCCGCAGGC-GCGTCT---  
CGGGAACGGGGC-----  
GCGG-----TGGCCCCT--  
TCCCG--CCGCCT--GCC--  
CTGGGCGCGGTTCGTCCCGTCTTCCCGTCACGAGCACCCCGTCCCCCTCGTCCGCCCGCGCCTCTCGCCT  
GCCGTCCG-----  
----

TCGCCGCGGTTCGGTTCGGGGCCGCGCGCGCACACGCCCGCGCGTTCGGGTGTCTACCTCTCCCCTCCCT  
CGCACGCCGTGCCCGTCCCC-AGCCTGCACCC-  
GCTTCCCGCCGACCCCTTGC-----  
-----CCCAACGTG-----GCGAGGGGCCTGGGCC--  
GCGGGT-  
GCGGGGACGGGACGCGGTGGTGGAGGGAGGAAGGGGGGCGGGGCCCGGGACGCGTGTC-----  
-----

GACGTGTGTTCGCGGGGTTTCCCGGCTTTGGCGTCCGCCGGGCGTCGGAACGACGGTGGTTGGTTCGGCGCGGA  
AGGGGCGTTGGGGGTTTAGGTGCCCGTCCCGGGTTCGGCGGGCGGCCCGTC--ACGGGACAGGCA-  
GCGCC---CGGGGGCTCTGCGCCCCACGCGTGTGCAGGTTGCGG-----  
GAACCGTTGGGGGTTGAGGCGTCGAGGCCGCGGAGGCGGAGGCGCCCGTGGGGAC-----  
---GTGG---TTCCCCACCCCGTCCGCTGTGTCCGCTC-GCTCC-----CCCCTT-T-  
CCAGGTACCTAG---CGCGTCC-CGCGCGGAGGTTTAAAGACCC- TGGGG-----GTC-  
GCCCGTCCGCT---CGGG-TCGGGG---CGGTCCGGC---CCGT-----GGGGAGG-----  
GTCCGGGG-----

GAT-----  
CCCCCGCTTTCTCTCCCCT-----  
-----  
-----  
-----  
-----ACCCCC-----GGGCGCCTGTGGGG-----CGTCCGA---  
GCACGCCCC-----TTG-----GGGGCCGTTGCCCCGGAC-----  
CGCCCC---GTG-----GTCATA-----CCT-TCCC-GACCCG-----  
CAGAGT-----CTGGT--CTCGTTTGTG--TCGCGCTCGGAC--GGCC--  
GCCCCGAGGCGCCTCCGCCCCACCGCCAGCGGGA-----  
-----CGTGGTGGGGGGAGAAGAGAAGGTTGCCGT-GCC-  
GGGGAG-----CGAAAACCAAAGTA-----  
ACCAAAACGTT--G-ACGACTCTTAG

Canis

GGAAGGATCATTAACGGAGAA-----  
CGCGGGCGGGCGGGCGGGAGGGCGCCCCGTCTTCCGTCCGTCCGTCCGCGCGAAGCCTT-----  
-----CC-CCCGTGCGGTG-----CGGGC-GGGCC-----  
GGCGC-----  
GGTGCCCGCCCCGCTGGCCGCGAGGG-----ACGTGAGAGA--GCGGGAGCGCGTGTGTGCGTGTCC--  
GTCCGTGGGGCGAGGACGGGGCCGCGTGAGGAGGAGGCAGGGGGAAGGAAGGGGCCGCGCCCGCCCGGGAGGC  
GCGGTGGAAG-CGCG-  
GCGGTGGCGGTGGGCGGCCCTGGCGTCGGTCGGTCGGGCGCCCCGCCGGGAGGGGAAGGGAGGGGGTGT----  
CGTCGGCGACGACGGCGTGTCTGGGGGGGAGACGGGCC-----  
-----  
-----CCGCG-----  
CCCGCCTCCCTTTCTCGGACGTCGCCGTCCCGGCCCCCCCC-----  
-----  
CCACCGTGTCCCTTCCGGGGGGGGTCCGCCTCCTCCGTCTTGGCCGCTCGCCTGGGGCTGCCGCCGGGTCTCCA  
CTCGCCGCCCCCTCGGCGGGCGGGCGGGCGGCTCGTCCCCCTGCCCTCC-----  
-----GGGGCCCCCTCCCTTCCGCGG-----CCCGCCTT--  
TCGCCTTCCGGCGCCGGTCTTCCCC-----  
GGTCGCC-----GCGTCGCCCCGCACGGGGG-TGCCCTCGGC-GCGTCT---  
CGGGACGC-GTGCACGCGG--CGGCGGTGCCCTCCGCGGTGTCTGTCGTCTCCTCCTC-----  
CTGC-----GGGGGGGGGGAGCGTCGGCCCGCGGGGGCGCCCGCCCGCCGGCGCGCC--  
TCCCG--CCGCC--GCC--CTGGAC-  
GGTCTCCGTCAGGCGGGCGTCCGCGCCATCTCCGCCCTCCCGCTCGTCGCCTCTCCCTCTCCACCCCGGCC  
ACCCCCGCCTCTGGGGCCTCGGGG-----  
CGGGTCCGGCTCTCCCTTCTCCGTGCGCCGCCCGCC-----  
-----GCCCCCTCCCCTGGCCCTGCC--GCTC-ACGCCCC-  
GTTCCCGCTGCGGGCCCCCCCCCGCC-----  
-----TCCGT-----GGCGAGGC-----GGGGCCCGGGT--  
GCGGTT-  
GTGGGGAGGGCCGGGGTGGCCGGCCGGGTGTTTTCTCCTAAGGCGAGGCGAGGTGGTGGCTCCCGGGGGTGT  
CCT-----

CGGAAGCGAGGGGATCCGGCCGGCCCCGCCCCGGTGGCTTTTGGGGCGGGGGAGAGACCGGGGAGAGAGAGGG  
AGGCTGGCTGTCGGGCGGTGGCGGGGCCCGCTCGCGGCGCCCGGGCCCTGGTCCGTC--ACGGGCCGGCA-  
GCGT-----CGGGGGCTCGCGCCCCTCGCTTGGCGGTGTCGGCCGCGCCGGCC--GGGGGAGGA-----  
TCGGCGTCGGGGCGG-----  
CGGCGGCGGCGGCCTTTGGCCTCGCTCCCCGCGCCCCGCTCGCCC-GTCCCCCCCC-ACCCTCTGT-  
CCAGGTACCTAG---CGCGTCC-CGGCGCGGAGGTTTAAAGACCCTTTGGGG-----GTC-  
GCCCCGTCCGCT---CGGG-TCGGGG---CGGTCCGGC---CCGT-----GGGGAGG-----  
GTCAG-----  
-----  
TCCCCTCCTCC-----AGAC-----  
TCCGCCGCTCGGTCCCCGCCACCCCGTGGGGTGTG-----  
CGGGGGGGGT-----CGCCACGCCACGTGCC--CGGTCCACGCGGCC-  
GCCGGGAGGGGG-----CTCGCCCCCTGCCCGGTGGCA--GTC--GTGCCGCTCC----  
GTGTGCGCG-----  
TGCGCCCCCCCCCCCCAGCGTCCCC--GGTGTG--GCGTGGGGCGGGGAGG--TGGGAACCCCT-----  
GGGCGCCTGTGGGGT-----TGTCCTC--GCTCGCCCCCGCGCCCGC-----CGTG-----CGCGGC-  
GGGGGCGGCGCCGGAC-----GCCCC--GTCGTTC----GTCCGA-----  
CCCTTCC--GACCTTCT-----CGGAGT-----CTGAT--CTCGTG-----GTCTCT-  
GCTGGCC-  
GGCCAGAGGCGCCCTCC-----  
-----GGGGAT--GTGCCGT-GCC-  
AGGGAGGGGG-----CTCTCCCCTCC-----  
GCTCGAAACTC--GTACGACTCTTAG

Felis

GGAAGGATCATTA-----CGAGAGAGCGCAGCGGTGGGGCCCTCCCCCT-  
GTT--CCGCTTGCGTGCCTTG-----CCACC---  
CGTGCGGCG-----CGGGC-GGGTC-----  
GGTGC-----  
GGTGCCGGCCCCGCTGGTCGCGAGGG-----AC--GAGAGAGCGCGGGAGGGCGTT-----  
GAGGGGCCTTTGGGGGGGGGGCGGTCCGAGGGGG-----  
-----  
TGGGGAAGA--AGGGCGGAGGCCTCCGCCAGGAGGCGC-  
GCGGGAGCCG-----  
-----ATG-----  
CGGCGTCCCC-----  
-----  
GCCGTCCCTGGCGTGCCTTCGCCCTCCTCTCCCCGCCCTCGCTGGCGCGCTTCCCCCCCCCTTGCGCCTCGCCT  
CGCCTTCCCCCGC-----GGAGG-  
TGGGTCTGAGGGTTGGGGGGTTGAGTGCCTTCCCCCGCCTTCTTCGCCTT-  
TGGCGCCGGTCTG-----AACCCGGTCGCC-----  
GCGCCGCCGCGCTGGCGCCCTGGCCGCGTCGCTCT--CGGGAT--GCGCGGCTTG--  
CGGTGGGTCCCCGTGG-----CGTC-TCCCCGGTCGGGT-----CTCG-  
CCTGTCCCGGGGGCCTTGAGCCTCGGCTCACGCGGGGCGCCCCGCCGTCC---GCCGCC--TCCCG--  
CCGCC---GCC--CTGGAT-GGCTCTCCGCT-

CCGTCGGGGGGGGTCCGTCCCCCGGGCCCGTCTTCTGCCTTGCGCGCCTCTCTTTTTTGCCTACCCCGCA  
GACCTTTTACCCCCCTTCTTCCGCCCTCCCTTCAGGCCCGGGTCCGGTCCGGGTCCGGCTTTCCGTCTCCT--

-----  
TCCCCGCCTCTCCCCGAACCGCCACCCCCACGCCCTTGCCC--GCTC-GTGCCCC-  
GCTTCCCCGCCGAGCCCCCTCCC-----

-----GCGGGGG--GGGGGCCTGGGCC--  
GCGGGTGCGGGGGAGGGGAC--  
GGTGAGGGTTGGTCCGTGCCACGGGGAAGGTGTGCTCGGAGGTGAGGGCGGGG-----

-----  
CCGGGGCCGGTCCGCCCGGCGGCCCTGGATGGGGGGAGAAGAAGGGTCGTGTGGGGTCCGGGGGGGTGGGGA  
AGCGAGGGGCGTCCGGCGGCGCGGTCTGTGGGG-GCGGTTAGCCCCGTCGAGCCTCCATC--

ACGGGCCCGCA-GCGT-----CGGG-CTCTGGGTTGCCCTTTGTGGGT-CCGGCCGCGGCC--  
GGGGGGG-----GTCGGCGTCGAGGTGG-----  
TTGGCGGTGTTGCGGG-----CGCTCC--CTCG-TCCCC--GCC-ACCTCGCC--

GCCTCC-----ACCCTGT-CCAGGTACCTAG---CGCGTCC-CGGCGCGGAGGTTTAAAGACCCT-  
TGGGG-----GTC-GCCCGTCCGCCT--CGGG-TCGGG---CGGTCCGGC---CCGT-----  
GGGGAGCC-----

GTGGAGGCTGG-----  
-----  
TCTTCCCGTGTCTCCTCC-----AGAC-----TCCGCTGCC-

GCCCCCGCCGCGCC-----CCGGCCGGG-----  
TGCCGCCGCGCTTGCGCCCACGCCACG-GCCC-----TCCCCGTT-  
GCCGGGAGGGG-----CTTGCCCCGCGGT---GCCGGTGGTGCCTGAGC--

GTGTGCG-----  
TGTGCGTGCSCCCGTGTCCCTTGGGTGTGTGTGGGGGAGGGGACAGG--CGGAACCCCCT-----  
GGGCGCCTGTGGGGT----TTGTTCCGA---GCTCGCCCCGCGG-----TCCG-----

CGTGGCTGGGGCGGGCTGCCGAC-----TTGCCCT---GTCGT-----TCAA-----  
CCCTTCC--GACCTCTT-----GGAGT-----CTGGT-CTTTGTT-----  
GTCTCTTGCTGGCC-

GGCCGGAGGCACCCTC-----  
-----GGGGAT--GTGCTGT-GCC-  
AGGTTGGGGGGCGCCCCTTTT-----CGGGTTGGCCCTCCCGC-----

GATCACAAAACTC--GTACGACTCTTAG  
  
Equus

GGAAGGATCATTACC-----  
GGAGCGGCTCGCCG-----  
CGGCGCCGAGCCTTTTC-----ACCC-CCGCGCGGCG-----

CGGGC-GGGC-----  
GGCG-----  
GGTGCCGGCCCCGTGGTCCGCGAGAG-----GTTCCGAGAGAGGGAGGGGGCGCGCGGGAGGCGC-----

GGGCGCCCGCC-----GGAGGCGCGGGAGGCG-----  
CGGGCGCGCCTCG-----  
-----  
TCCCCGGTCCGGCGGTGGTCCGGAGGGAGTGGGCTCG-----



-----ATGTC--  
GGCGAGCCCACGAGCCCCT-----  
-----  
TCCGGCCTCCGTCCGCCCCGGCGTTCCGAGGCCGCCGCTCCTCCGCGCCGCCCGCCCCGGCGCGTCCGTCCCCGC  
GCC-----CTCCGGTCTCCCG-----GAGG--CGGG-  
CCGGAGTTTGTGCGCGCCGCGCCTCC-----  
-----GTCTCCGGCGCCGTCCGTCCCCCGTCTC-----  
GCGGGCGGGCGGCCCTCGGC-GCGTCT---CGGGAA-GG--GCGGCGTGG--  
TGGCGCGAGCCCCCGCGAGTCCCCGGGGTACAGTCCCC-----  
GGGGGGCCTCGAGCCTCGGCTCACGCGGGG-TGCCCGCCGGCCGCCCGCC--TCCCG--TCGCC---  
GCC--  
CTGGGCCGTTCCCCGGCCGTGGCGTGTGTCGTCCGTCCGACGGTGCCTCCGCGTCTGTGCCCGCCCTCGGGCCCC  
CGGGCGCCCCGCGTCCGGCCGGCCACGTCCGCCA-----  
-----  
-----CCCCCTCGCCCTGCC--GCTC-GCTCCCC-GCTTCCCGCCGACCCCC--  
TCCC-----  
-----CTCCGT-----GGCGAGA-----GGGCCTGGGAC--GCGGGT-  
GCGGGGAGGGTCCCC-----  
-----  
GGGGGAAAGTCGGGTCCGGTCTGGTGGCGTGCCTCGACGCGAGGGGGCCCGCCGGCGTCCGAGGGGGCCGTGG  
GCGCAGTGGGGTGTGCGTCCGGCGGCCCGGGCGGGGTTCCGTC--ACGGGCGGGCA-GCGC-----  
CGAGGCC--TGCCTCCGTCCCC-----GGGTGGCCGCGGGCGGCGC----  
GGGCGGCGTCCGAGGCGGTGGCCGCGCGCACTACCC-----  
GCTCCGCCTCG-----TCCGTTTCTTT--GGCTTC-----CCCCCAT-CCAGGTACCTAG-----  
CGCGTCC-CGGCGCGAGGTTTAAAGACCCC-TGGGGGGC--CTCG-GCCCGTCCGCCTT--GGG-  
TCGGGG---CGGTCCGGC---CCGC-----GGGGA-----  
GTCGGGGAGGCCT-----  
-----  
GGCCCTTCTCCCC--AGAC-----TCCGCCTTCG-----  
CCGGG-----CGAGAG-----  
GCGCCGGC-GCCCC--GTCGCGGCGGCC-GTCGGGAGGGGGCG-----  
TCCCCGGCGGCC---  
GTCGTGTCAT-----  
-----CGCGTGCGCGTG-CGCGCCCCGCGTCTT-CGGGCGAGG--CGGGAGCCCC-----  
GGGCGCCTGTGGG-----TGTCCGA--GCACGGCCCC-----  
GCGGGCCCGTGCCGGAC-----GCCCC--GTC-----GTCAA-----CCT-  
TCC--GACCTC-----ACGGAGT-----CTGGT--CTCGTTGT-----GTCTTCC--TGGCC-  
GGCCGGAGGCACCCTCC-----  
-----GGGGAT--GTGCCGT-GCC-AGGGGCGGG-  
CTTCCCCC-----GCCCTGCGGGGGGACCCCGCC-  
GTTCAAATC--GTACGACTCTTAG

Sus

GGAAGGATCATTAACGTT-----  
GGCGAGAGCGTGGCAAGCGGCGGCCCGCGTCTGCCTGCCCGCCCGCCCTGCTCGCTCTC-

TCGCCTCC-----TCCACC---TGC GCGCG-----  
CGGGACGCGA-----  
-----GGG-  
CGGGAGGGAAGGCGCCTGGAGGTGCGTGTTCG---  
CGGCGGGGGGAAGGGGGGACTCACCTGGCCGGGGTTGGTGCCCTTGTTCGGGTACCC-----  
-----GGG--GGTGGGAGGAA-  
AGCGGAGAGAGAGGCTGCTCTGGGGGAGTG-----TGGATGGCATCCGAGGGACCGGGT---CAGG--  
CGGC-----  
-----  
-----TTG----  
GCCGTTCTTTCCCGGCCTGCTCCCCCACC-----  
-----  
ACGCGCTTCTCCTCCTCCTCCCCCGGCGATCCCGGCTGCCACCGCCCCGTCCCACCCCCCCCCGACGCC  
CGTGTAGTGCTTGACGCATTCCGG----  
CGTTTCTCTTCCGCTGACCTCCCCGCCACGT-----CGCCGA-----GAGG--  
CGGGTCCGAGGGTTGAT-----CCGGGCTTTTTGGGG-  
GGGCCGGCCGTGCCCTGCCCCCAACCCCCGCGC-----  
GTCTCTGTCTCCGGTCGCGC-----GGCCTTGGCTGCCCCGTGGTGTTTTTGGC-  
GCGTCT--CGGGAT-  
GGC-----  
TTT-----GCC-TCCCG--  
CCGC--GGCT--  
CTGGGCCGGTTTCTCCTCCCGCCGTTGGTCTCCATGCCTCC-----  
-----  
-----GCTCCACTGCTCCGATCCTGCCGCC--GCTTG-  
GCCCCGGC-----  
-----CCTCTCCTG-----  
TCCTCGGCGGCGGCGGCGGCGG-----  
-----  
CGGCGCTGCTTGCGGTGGGGGCGGTGGTCCGCCGGCGCCGAGTGGCTCCCGCGTC--ACGGGCCGTCA-  
GTGCCAC-GTAAGACCC--  
GCGTTCAGGGCGGGCCGCGACGGACGGAGTTCGTTACCCG-----  
TCGTCAGGGCCGCGGT-----  
CGTTGGGGGCGCCTGGGTGCGGCGCTTTCCCCCTCCCTGCCCGCCTCGCCC-GCCTCC-----CTC-  
TCT-CCAGGTACCTAG---CGCGTCC-CGGCGCGAGGTTAAAGACCCCTAGGGGG---GTC-  
GCCCGTCCGCTT--GGGG-TCGGG---CGTCCGGC---CGGT-----  
GGGGAG-----  
GAGGAG-----  
-----  
TCCCTTCTCCCC-----AGGC-----TCCGCTT---CCCCCA-  
TGGG-----CGGGCCCC-----CGTGCCTCGTCGCGGTCCA-  
GCCCTCTC-ACCGTGGCC-GTCGGGAGGGGG-----CTTATTCGGTGGCC---  
ATCGCCGGCCAGTCGGTCC-GTG-GCCGTGTGCGAG-----  
CGA-----GCGCGTGTGTG-----CCCGTGCCTGTGTTGGGGGG--

TGGGAACCC--GGGCGCCTGTGGGT--TGTCCGT--GCCCCACCCACTCAC--  
CCGTGTGT--GTGTGTGTGTGGG-CGCCGGAC--GCCCC--GTCGT--  
GTGAAG--CCT-TCC--GACCC--ACCGGT--CTGCTTT--  
GTTTCCC--TCT-GACTCGGC--  
GGCGAGAGGCGACCCCGCCCGCTCTCCACCCAGCTGCCCCAGT--  
GGGCGGGTGGGTCTGGGGAGGAGGGGGGCGAGTGTCCGT-GCC--  
GCCATTCC--  
AAACCAAGCAC--GTACGACTCTTAG

Tursiops

GGAAGGATCATTAACGTGGTCCGAGGGCGCGGCGGCC--  
ACCCGTCGCGCTCGCG--ACGAGTCTTC--CCACC--  
CGTGGCG--  
CGGG--  
CGGGAAAGGAAGGGGGAGGGAGGCGACC--GGAGTCGGCACCCGGCGCGCGCGCGT--  
CGTGTGCCGTGCGCG--GGGGGCGCGGGCGGCCGTCGGGTCGG--  
TCGGTCGGTGGTCTCCGCGGTGGGGAGGAGCGAGAAGGGGGTGG--  
CCCGTAAAGCGGGGGGTCGGGTCCGCGAGGGGCGC--  
-----TCCAC-----  
GCCTCCCTCGCCGCGCCCGCCGCTGCCCCCTCGCCACGCG--  
-----  
CCTCCCGCCACGGGGCGACGCCGTCCCGACCTCCCGGGTGGCCGCCCGACGCCGCCCCGCCACGCCGCGTAC  
CCGCGAAAGTCGGGGGCTATCCCGGCGGTCTCTTTCCCGCCGACCTCCCGCCACGT--  
-CGTCCCCT--GAGGTCTGGTCCGAGGAGGAGGGTCCGGGTTT--  
GGCCGGGCCCCGCCCTCCACGCGC--  
GCCTCCGTCCCCGGTGCCGGTACGCCCAACCC--  
GTTCGCGACCGCCCCACACCCCGCGGAGCCTCCGGT-GCGTCT--CGGGTTGGT--GGCGCG--  
CGGTGGCGTGACGGTGGCGGTCC--  
CCCTG--GGGGCCGCCCGCCCGCCCGCCCGCCGCTCGCCT--  
TCCG--CCGC--GGCC--CTGGCCGGTTCCCC--  
GCCGGTCGGTCTGGGTCTCCGCTCCGTGCCCTACGCCCTCGGGGGCGCCTCTTTTACCTGTGTCCCGAGC  
CCCGGACCTCGCCTCCCTCCGTCGTCCGTCCGGTCTCTCTC--  
-----  
GCTCTCTCTCTCTTTTCGCGCCCTCCCTCCCCGTTGCGTCCC-TGCCGGCGCTC-GCCACCC-  
GCTTCCCGTCGAAGCTCCCCTTACGCC--  
-----TCGG-----  
TGGCGACAAGGGGTGCCCGGGAACGCGGGCGGGCCGGGCTAGGGCCGCGGGGGCCGGGCGTTGGGGTTCAG  
G--  
AGCAGAGAGGGCCGCGTCCGGGCGGAGCGTGGGGAAGGTCTCCGCCGTTTCGGGGACACGGGTGTGGGGGCG  
TCGTGGGGCGGTGGCCGTGGTGTCTCGTGTGGCGGTCCGCCCGCCCCCGCCGGGGTCCCGCGTC--  
ACGGGCCGTA-GCGC--CGAGCCCCCGCGTGT-GCGGGCGGCCG--  
GGGCGGAGAAGCGTGTG--GTCGGTGTGGGG--  
CGGCGT--  
GAGCGTGGGGCGCCCCGCGCCAGCCCCACCCCCACGCTCGCC-GCCTC-----CCCCCTCT-

CCAGGTACCTAG---CGCGTCC-CGGCGCGGAGGTTTAAAGACCCA-TGGGGG-----GTC-  
GCCCGTCCGCCTT--GGGG-TCGGGG---CGGTCCGGC---CCGC-----GGGGA-----  
GTCGGGAGGCCCC-----  
-----  
TCCCTTCTCCCC-----AGGC-----TCCGCTTACCCCCCCCACCACCACCGGCACC--  
TCACCACACACGGGGCCGGGGCGCCGCGCC-----GCCGCGGC-CGCCGTCCACCC-----  
GCCGCGGC-GTCGGGAGGG-----CTACCCGGCGGC---  
GTGGTGCGGGCCGGGGCC--GTGCGCCGCGCCTGCGC-----GCCCCG--  
GTCCCCTGTGTGTGCGTGC GCGC--CACGGTCCGGTTGGGGGGGCAGG--TGGGAACCCCC-----  
GGGCGCCTGTGGG-----TGTCCGA--GCCCCCCCCG-----CCG-----  
CGGGTTCG-TGCCGGG-----GCCC--GTG-----GTGAA-----CCC-  
TCC--GGCCCC-----TCCGT-----CTGCTT---GTTT-----CTGTCT-GACTTGGCC-  
GGCCAGAGGCAGCCCCTC-----  
-----GGGGGAAGGTGCCGT-GCC-  
ACCGCGGGGACCTC-----CCCCGCCG--AAAAACC-  
AGAGAAACCAAACTC--GTACGACTCTTAG

Bos

GGAAGGATCATTAACGCGGTC-----GGTCCGAGAGCGGCGGGGG-----  
CCTCGCCCCGCCCGCGCCCGCTCGCGAGCCTCTCT-----  
CCGCCCGTGC GCG-----  
CGGGATGGGA-----  
-----CCGGGAGGAGGGGAGAGGGGGAGAG---  
CGAG-----  
ACGCGTCCGAGGGCGCCCCGCCCCACGGGCGGCGGGGGCCGGTCCGGGGCTACTCCCCGGTGTGTCTGGGG  
GGCGAGGAGC-CGCG--  
CGAGAGAGGTGGGGGGCGGCGTGGCAGAGTTGTGG-----  
-----  
GGATATCGGGTGGGAAGAGGCGGG-----  
-----  
-----TTTCCT-----  
CCGCCTGCTTGCCCGCTCGCGCCCTCCTCCCGCCG-----  
-----  
GGCCCCTCCGCGCCTCCGTTCCCCCCCACCGGCGGGGGCGCCCCGCCACCCTGCCCGTCCCGGTGGCGTC  
GCCCTCCGGCGTGCCTCCCCTCTCCCGATAGCCCG-----  
CC-----  
NNNNNCCACCCACCCACGCGCCT-----  
TCGCCCCGTGGCGCCGCCACGACTGCCTCCCCCACAAGGCCGCGGATCCGCGGGCGGGATCCTCCGGTCCG  
CGTCTGG-CGGGCTGTGCGGCGTGGCGGG-  
CGGCGGCTCC-----  
CCGTC-----GCGGGGCGCTTGCTTGCCCCGCCG--  
TCCCG--CCGC--GGC--  
CTGGGCGGCTGCTGCTCGGCCGGTCCCGGCCCGGCGTCCGTCTGCCGCTCTGGGCTGCCGCGCGGTCCGAG  
GCGCCTCGCCTCCCCACGCTTCCGAGCCTCGGGGCTTCTCCCGCCCCGTCCCCACCCCCACGCTCCCGCG  
-----

GCCGTCTGTCCGGTTCTCCCGCCCTGTTTTGCCTCTCCCGTACCTCTGACGCGTGTCCCCTGCCCGCTTGGCGC  
CCA---GCTCCCCGTCGGAGCCC--  
CTTCCC-----  
-----TCCGCCCTCGG-----TGGTGGTGTGTGGGGGGGGGAGGGTGCC-  
CGGGAACGCGGGTTCCGGTAGGGGTCCCCCAGCGGATGGGCTGGGGCGAGAGGACGGGGTCCGGCGGGGCCGGC  
CGCA-----CCGGGTGTGTGAGGGTTGGAGGGGGCGGGGGCGGGCTCTGCCCCGCGTCTC-  
GGGGGGGGGACGGCGGGGGGTGGTCGTCTGGCGTCGGCGGGGCCCTCCGGGGCCGGCGGTCCGGCCGGCGCGCGG  
CGGGGCACCCCCTGCGGTC--ACGGGCCGGCG-GCGC-----CGAGGCC--GCGTG-----  
CGGCCGCGGGCCCCGTGGGGGGAC---  
GCGGCGGTTGGGGTTCGACGTCGGGG-----  
-----CGTTGGCCCCTGGGGCGTGCCTGCCCTCGCCC-GCCTC-----ACCCTTT-  
CCAGGTACCTAG---CGCGTCC-CGGCGCGGAGGTTTAAAGACCCC-TGGGGGGGGGGTGTG-  
GCCCGTCCGCTT--GGGGTTCGGGG---CGGTCCGGC---CCGC-----GGGGAGTA-----  
GTCGGGAGCT-----  
-----  
GCCTCCCGTCTCCCCC-----AGAC-----CCCGCCGTCCC-----  
CCGAGGGGA-----CGGGGTGGCGCGCGGC-----  
GTGGCGCGCCACGGTCACTGCC-----GCCGCGCC-GTCGGGAGGGGG-----  
CTACCCGACGGC--GTCGTGTGGGCT-----  
GTG-----  
GCCGTGTGCGGCGGCGCGTGC GCGCG--CTGCCCCGCGTCCC-TGGGGGAGGGTTGGGGGCCCCCC-----  
GGGCGCCTGTGGGGT-----TGTCGA--GCCCCCCTGG-----  
CGGCTTGG-CGCCGGAC-----GCCCC--GTCGT-----GTGGAA-----  
CCTTTCCG-GACCC-----TCCGTT-----CTGCT-----GTTTT-----CTGTCT-  
GACTTGGCC-  
GGCCAGAGGCAACCCCCTGCCCAACTCCCACCTCC-----  
-----GGGGAGGGAGGCGGGGGTGGGTGGGAT--GTGCCG-GCC-  
AGGGGCGGGTGTCCC-----  
GCCGAAACGAAACCCTT-----GAAACCTC--GTACGACTCTTAG

Bubalus

GGAAGGATCATTAAACGCGTCT-----GGTCCGAGAGCGGCGGGGGGG-----  
CCTCGCCCCGCCCGC--CCGGCTCGCGAGCCTCTCCT-----CCACCCG-  
TGCGCGGCG-----  
CGGGATGGGA-----  
-----  
AGGGAGCAGGGGAGAGGGGGAGAAGGACGA-----  
ACGCGTCCGGAGGGGCTGCCG-----  
TCCCCGGTGTCTCTGGGGG-CGAGGAG-  
CGCGCGCAGAGAGGTGGGGGGCGGCGTGGCAGAG-----  
-----  
TGTGGGGTCCGGTGGGAAGAGGCGGG-----  
-----  
-----TTCTCC-----  
CCGCTGCTTGCCCGCCCGCGCCCTCCCCCGCCG-----

-----  
GGCCCCTCCGCGCGTCCGTTCCCCGGCGTGTTGTCCTGTCCCCTCTTCCCGAA--  
GCCCCGTCCCTCCACGCCACGTCCCTCGNNNNNNNNNN-----

-----  
-----NNACCTAG----CGCGTCC-CGCGCGGAGGTTTAAAGACCCC-TGGGGGGG--  
TTGTC-GCCCCGTCCGCTT--GGGG-TCGGGG----CGGTCGGGC----CCGC-----  
GGGGGGAGTA-----  
GTCGGGAGGT-----

-----  
CCCTCCCGTCTCCCCG-----AGAC-----TCCGCCGTCCC-----  
CCGAGGGGA-----CGGGGTGGCGCGCGC-----  
GTGGCGCGCCACGGTCGCTGCC-----GCCGCGCC-GTCGGGAGGGGG-----  
CTACCCGACGGCC--GTCGTGTGGCC-----  
GTG-----  
GCCGTGTGCGGCGGTGCGTGCGCGG--CTCCCCCGCTCCC-CGGGGGAGGG-TGGGAACCCCC-----  
GGGCGCTGTGGGGT----TTGTCCGA--GCACGCCCTGG-----  
CGGGTCGG-TGCCGGAC-----GCCCC--GTCGT-----GTGAAA-----  
CCTTTCCC-GACCCC-----TCCGGT-----CTGCT-----GTTTTGT-----GTCC-  
GACTTGCC-  
GGCCAGAGGCAACCCCTCCCCAGCTCCCCCTCC-----  
-----GGGGAGGGAGGCGGGGTGGGTGGGAT--GTGCCGT-GCC-  
AGAGGCGGGTCTCC-----  
GCCGAAACGAAACCCTT-----GAACACCTC--GTACGACTCTTAG

Sorex

GGAAGGATCATTAACGGAT-----CCCCGCCCGCGCGTCCG-CCGGACGGG-  
ACGC-----TCTTCTCGCGAGC-GAGCGAGGAGAA-----ACC---  
CCGTGCGGCGCGGGGGTCCCCCGGGAG--GAGGGCGGAGGAGGAGGCGTCGGGGTCCG--  
CCCCCTCCCTCCTCCCCACCCCTCCGTCCCTCCTCGCGGGAGCCCCCGCCGTTCCG--AAT---  
GGGGGAGGCGCGCAGGGGGCGCCGAGGCGAGCTGG-----







GTGAAA-----CTTCTCCCCGACCCTC-----TTTGAGT-----CTCGTTA--  
TGTATATTTTTCTCGTCT----  
CT-----  
-----GTC-GGAG-  
ACCCGCCGTCCG-----ACACACGG-----  
AAAAAACAAAAACAAAACCTC--GTACGACTCTTAG

Monodelphus

AGAGAGAGCCCGCCGTGCTCTCAGACGCAGCGGGGCCCGTCCCGTCG--TCAGGCCGCGTCCGGTGGAG----  
TTTCCCTCCCGTGGGGGGGGGGGCCCGCCGGC-GGTTTTCTGCGACGGC-  
CGCGGGAGAGTCGCGGCGCGTGTGTGTGCGCCCGC-----GACACC---CGCGGCCGGTTCCT-  
TGACCAGCGGGGTGCGGGGGTGG-TCGTT-GCGGTGTGTGAGGGCGGAGGGGAAGGTCTCCTTCCCCCGCC-  
ACCTCGCGCGCC-TCCGCTTCCCC-TGCCCTGCGCC-CGATTGCGGCTCGTCCGCCCGCGCCGCCTCCC-  
GCGTCGGGGG-TTGCTTC--GGCCACG-TGAGGGTGC GGAGCC-GCCCGAGGGAACCCAGGCT-  
CTAACGC-GAGCGAGGGAGAGCTGCGGC-TTGGGAAGGG-CTCGGCGAGCGGCAGCC-  
GGCCCCCTGCAACCCTGCCTTAGCCCCCTCTCC-GGAAGAGACTCC-AGCGGGGCGTCGG-TTTCGGTCCA-  
GTGTTTGC GCGCGCCCTGG-GTCTCGGGCGCCGAGGGCGGCG-CCGCCGGTTCGCTGCCTCGTGCCGCGG---  
CCCCGGGGCACCCG-TCGGTCCCTTCCCGTCTTTCCTGCTTCCCGTGCCCC--GGAGGA-  
GTCCCGCCGGGAGGCGAGAGTCCGCCGGCTACCCCGCCACACACAGGGTCCCCAGAGCGAGAGGGGCGCCAG  
GGGGGTGTGGCTGCCCC-GACCGTGAGGGGTGGCCGGCGG-TGGCCTCCCCGGGCTC-  
GACGGGAGCGGGGCTGGGTGTGGG-  
AGGGGGCCGTCCCACGGCGGGAGCCTTAGGGCGGTGTCGTTCCCGGTCCCGGGCTCGAGGCGTCGTGGCGGCTG  
CGGCCGACCGGGCGGCGTTCGGTGGGTTCCCTCCGGCGCCGCTCGGCCCGCCGGTACCCCGGCGGCGTCCCGGA  
CGCCGTGCGGCGCCCGTGC GCATGCCGAGTCCCCCGCGGCGGGGGTTCGAGCGAGAGGAATGCTGCTCG  
AAGT-  
GCTTGACCACGATCCCGCCGCCCGGCGCGGTGTCGCCCCCGCCGCTGCATGTGCGGGCTTCGGGGGAGGTGGC  
GAAAAGGGGGAGAAGACCCGGCGTCTGTCGCGGGCCCC-  
ACCCCTCTCCGTGTGGGCGGTTGGGGCCCCGGGTGCCCGTTCCCGCCTTCGGTTCGTAAGGTCCCCGCTTCC  
ATGGGGGAGGAAAGGG--  
TCGGTGATTCCCTCGGCCGAGCGGCGGGGCGGGAGCTTAAGGCGGCGGTGCCTCTCCTCCCCTTTGCCCCCTC  
CTCCGCTCCGCCTCAGCCC-GCGGTCCGGT--GTCTTTTAG-GTTCTCCGG-  
GTCCGTGCTCGCCGACGCGGCCGAACCGCCTC-GTCCCCACCGGTGGGGCGGG--  
TCGGCGGTGCCGAGGCCCTGCCCC-GGCGGCTCGAGAGGGTCC-  
CCTCGACGTGTGGCCAGCGAGGGCCCCGGCGGTACGGCGCCGGGGTCCGTCCTCGCTCGAGTGAGCGTCTT  
C-  
CCTCCGAGATGGGGAATTGGGGTTGGCGTGACCGGCCGGGTGTGCCTTGGTCGCTCGTCCCGACCGCCCCGAGGG  
GCTGGGGCGAAAACCTCCCCGCTCCTCTCCGCTGTGCGGTCTAGCCCCCGGTTGGGGCGTGGGAGGCCCTTCCG  
CCCCATCCTGTCCCGGTACCTAGCGGTTCTGGCGC--  
GGAGGTTTAAAGATTGGGGGTTGCCCTCCGCTCTCCAGCGGGTCT-----  
GGTTCTGTTTTCCCCCTTCCCCGTCCGCCCTCT---  
TCCGACGGTCTCGGGCCCTCCTCTTGCCGCGTGCCCCGTCCGCGGGTCTCGCGGCTAGAGGTC---  
GGGGGTTTGGTGCCCC--GAGACGGGAAGGGCGGGTCTGGGTGGGGGGTCT-----  
TGGGACGGCCGCCCTGGGTTTGCCGGACGGGCCAGTGGGAA-----  
GAGGAGATGCCTGGCTCCGACTTCTCCCGTCTCCGGTGTGGTGTGGGTTCCGGTCCCGGTTCGTTGGGGACCGC  
CCGCCCGCCCTCGGTGAGGTGTGCTCCGCGTGGAGGCCGCGTCTCCCCGGTCTTTCGTGCTCCCCTGGC-----  
-----

-----  
-  
CTTCTGGGGGAGGAAAGCGATCCCGCCCGCCGCTCGCTCCGTGTCTGGTGGCGTGGGGGGGAAAGCCTCGTAC  
GGCCTGCGGGCCGCGACGAGCTCGGCCGTGGGGTCGAGGGCAGTAAGTAGTCCGGTCATCGGGGAGGGGGGAGG  
ATAGAGCGGAGTGCTCTTTTCCCCCTCTGTGTGCGTGCGTGGGGTGACCGCGGTTTCGCGCTGTCGTCGCCCGGA-  
TTCGTGTGCGGGGGGGTGCAGTGGCTCGGTGGGGTCCGTGCC---AGGG-  
TCCGATCCCCTCCCGCCCCCTGGGAAGGTTGGGGTCCCACTCCCCGGTCTTCTCGGCGCTCGCCCTGGGCCTCGC  
CGAACCCCGTGCCTTTCC--GGTGCG-  
GCGCCGTCCGTCTTGGTGCAGGGCCGCTCGCTCCTCGCTGCACGTGGA-GTGCG-  
GGCGAGGACTCTCTGTTTCGA--AACCTCCCCCTGATCCCCGGTGGGCCG--  
TCGCGCTGCTTGCTCTCTGCCCCTCGCTGTCTCGCCGCGTCC-GC-  
TTCCGACGGGCTTCCCTGCGCCGTGCTGGG--GGATGCCCTCCCGGGG--  
GCTCCCTCTCGTCGGCCTTCCCTGCGCCGAGGGCCGGCGCCGCGACGAGGCTGGGTGCTCGCTCCTCCCCCTCCG  
GTCGGGTTGCCGTTGGCCGGGTTGCCCGCGTGCCCCCTCCGCGGGGTGCGCCCGCTTGGGTTTGTGCGTGGGTG  
CCGTCCCCCGCGTGGCCCCGTCCCGCTTGCCGCCCC-  
GGGGACCCCGGGCGCCTGTGGAGTTTGGCCGCGAGGCCGGCCGTGGCTTCG-CGGGAGCGG-  
TTCCCGCGCTGCCTCCCCGGGACGCCCGGGAAACGGTCGTTCTC-  
CGAGCCCCCCCCACTGCCAAATCGTGTGCTGTCTCGTTTTTTACCTTCCGTTTACGCGTTGTGGGGGTTGCTGTGG  
GGTGTGGGGG--GGCCACGCG-CCTCCCCCCCC-  
TCCCTCCCTCCCGCGTATCCCAAAAAAACAAAAATTTCG

;  
end;
