# Supplementary material for: Analysis of Mammalian rDNA Internal Transcribed Spacers
Source: PubMed Central journal article supplement (PMC3834078; doi:10.1371/journal.pone.0079122), 2013-11-19
Supplement: pone.0079122.s002.pdf [file pone.0079122.s002.pdf]

```

#NEXUS
begin data;
  dimensions ntax=36 nchar=3169;
  format
    gap=-
    datatype=DNA;
  matrix

Pongo
TCAAT--CGCCCC----CGGGGG-----
TCCCTCT-----
-----GGGCTC---TTTGGGGT----
GCA-TGGCT-TGGGGTCC--
CTTGCCAGGGCCCTCC-----
-----
GGGGCCCTCCATCCCCCAAGTGCAGACC-----AGTGACGTCCGCCCTCCT-CTTCT-GCTATACCC--
GCCCCT-TCCCC-TCTCCC--
GCAGGCCCTGTGT-----
-----
-----AGTC-ACGCGTTGGGTATCGTGGG-
GAAGGGAG---TCTCCCGGCTGT-----GAGGAAGAGAAAGAAGGCAGCACT-----
GCCAAAGGTGAAAACAAA-GAGGGAAGACA-----GCCGTCTGGGG---
CCGAGT-----TCCC---
GTGGCCAC-----
-----
-----CACC-ATGGTCCGGGTTCCCTCCCTCGG--AGGC---
TCCCTCATGCCTCA----CA----CAG---CTCGTGGTGTGGGGTTC-GTTGGTCCT----GGT-----
GGGGTGGAA-----GGT--CCCATGCC-----ATCGTCATT-----GTTGTGCGTCATCAAT---
GGTGGTGGG-GGCTTGTTG-----GGTGGGGAGGAAAG-CAAGT-----
AAGAATGG-----TCCACCGGG-C-AGAAGGG-----TGGGGCAGCGCGTCCCAGTTGGTGCC-GGTTT-
GCACCCG-----CCCCCTGG-TGG-----
GAACAGT-----
GACCAGTCGATGTCAATCCAGGCCACCCTTGCTCGTAATAGCGT----CAAGGCAC-----
GTCCTTCTTAATCCAGCC-TGACCT-----GCCACCCAAACCGC-----TCG-
TTCACGGCGC-----GTCCGGGCC-----GGAAGCCC--GCCCC--GCGGCCCG-----
CCCGGCCGCGCTCGCGGCCGCGGTCCC-----GGGTT----CGCGT-GCCCCCGGCGG-TGAC-CCGC-
GG-----GACGCC--GCGGTGTC-GTCCGCCGTC-----GCGCGC-----
CCGCCTCCGGCTC-----GCGGACGCG-CCGTGCCG-TGCCGGG-G-----
CCCCGTCCCCGGGCTTCCG-CGT----
CGGGGCGGGTGT-----
-----
-----
-----
-----

```

---GCGGCGTCCGTCCGTCCGTCCGTCCCGCCCC---CGGCCCGTGCCCC--TCC-CTCCC---GTC-  
GTCCCGCCCCG

-----TCCGGCGGGGCGGGGCGG--CGGGGTGCCGTCCGCC--GCG-----  
GCTCCCTCT-TC-TCGCCTCTCCCT-----TCGC--CGGGC-----  
CCGTCTCCGGAC-GGGGCGTC-GGG-----  
CGGGCCGGCGC

--GTTCCGTCC-----GGCCGCCCCCGCCCGTTC--GCGC---GCCTTCCCC-----  
TCCGAGAC--GC-GACCTCAGATCAG

Gorilla

TCAAT--CGCCCC---CGGGG-----  
TGCCTC-----

-----GGGCTC---CTCGGGT-----  
GCG-CGGCT-GGGGTTC--  
CCTCGCAGGGCCCCG

GGGGCCCTCCGTCCCCCTAAGCGCAGACC-----CGGCGACGTCCGCCCTCCT-CTTCGTGCCGCGCCC--  
GCCCC-TCCCC-  
TCCCCCGCGGGCCCTGCGC-----

-----GGTC-ACGCGTCGGGTGGCGCGGG-  
GAAGGGGGGGGCGCCCGGCTGT--GAGAGAGAGAGAGAGAGGGAGGGCGGCGCCG-----  
CCGCCCCGAAAGACGGAGAGGGC---AAGAGAGAG-----GCCGGCTCGGG---  
CGGAGA-----TCCC---  
GTGGCCGC-----

-----CACC-GCGGTCCGGTTCCTCCCTCGG--GGC---  
TCCCTCGCGCCGA---CG---CGG---CTCGGGTTCGGGGTTC-GTCGGCCCC---GGC-----  
CGGGTGGAA-----CGT--CCCGTGCC-----GTCGTGTC-----GTCGCGGTCGTC-----  
GGCGGTGGGGGCGTGTTCCTGTGGT----GGTCGGCGGGGAGGAAGG-CGGGTCC-GGA--  
GGGAAGGGTT-----CCGGCGGGGAGAGAGGGCG----TGGGGAGCGCGTCCCGTCCCGC--  
GGTTCGCGCCCG-----CCCC-TGG-TGGC--GGCC--  
GGCGTTC-----GGCCGACCG-CCGCTCCCCCGC---  
CCTCCTCCTCCCCGCCGCCCTCCTCCGAGGCC---GT-  
CTCCCCCTCGCCCTACCGCACGCACGCACGCCCGCCCGCCCGCCCGC-----  
TCGCCTCGTGGCGGTG--GTCCGGGCC-----GGAAGCCC--GCCCC--GCGGCCG-----  
CCCGCCCGCGCCCGTGGCCGCGGTCCC-----GGGGTT----CGCGT-GTCCCCGGCGG-CGAC-CCGC-  
GG-----GACGCC--GCGGTGTC-GTCCGCCGT-----GCGCGC-----  
CCGCTCCGGCTC-----GCGGCCCG-CCGCGCCG-TGCCGG-A-----

CCCCGTCCCGTGCTTCCG-CGT----CGGGGCGGGG---CGGCTCC-GCCACCGCC-----  
GCCGCGTCC-TCGGACCCGTCCCCCGCGGC-  
CTCC-----

-----GCGGGGAAGGGTCGG-----  
GGTGT-----GCGGTGCC-----CGTCCCGCCCC-----CGGCCCCGTGCCCC--TCC-  
CTCCG----GTC-  
GTCCCCG-----

-----TCCGGCGGGGCGGCGC----GGGGTGCCGTCCGCC--GCG-----  
GCTCTCTCTCCCGCCGCTCTCCCC-----TCGC---CGGGC-----  
CCGTCTCCCGAC-GGAGCGTC-GGGCG--GGCGGGCCGGT-GGG----  
CGCGATTC-----

-----CGTCCG-  
TCCGTCC--GCCCGCCGTC-----GACCCCGTTCCCC-----TCCGAGAC--GC-  
GACCTCAGATCAG

Homo

TCAAT--CGCCCC----CGGGGG-----  
TGCCTCC-----

-----GGGCTC--CTCGGGGT----  
GCG-CGGCT-GGGGGTTC--  
CCTCGCAGGGCCCCGCC-----

GGGGGCCCTCCGTCCCCCTAAGCGCAGACC-----CGGCGGCGTCCGCCCTCCT-CTTGCCGCCCGCCCC--  
GCCCCCT-TCCCC-TCCCC-  
CCGCGGGCCCTGCGT-----

-----GGTC-  
ACGCGTCGGGTGGCGGGGGGAGAGGGGGGCGCGCCCGGCTGAGA-----  
GAGACGGGGAGGGCGGCGCCGCCG-----CCGCCCGGAAGACGGAGAGGGA----  
AAGAGAGA-----GCCGGCTCGGG--CCGAGT-----TCCC---  
GTGGCCGC-----

-----CGCCTGCGGTCCGGGTTCCCTCCCTCGG-GGGG---  
TCCCTCGCGCCGCG----CG----CGG---CTCGGGGTTCCGGGTTT-GTCGGCCCC-----GGC-----  
CGGGTGGAA-----GGT--CCCGTGCC-----GTCGTCGTCGTCGTC-GTCGCGCGTCGTC-----  
GGCGGTGGG-GGCGTGTGCGTGCGGTGTGGTGGTGGGGAGG-AGGAAGG-CGGGTCC-  
GGAAGGGGAAGGGTG-----CCGGCGGG--AGAGAGGG--TCGGGGAGCGCGTCCCGGTGCCCCG--  
GGTTCGCCGCCG-----CCCC-CGG-TGGC--GGCCC--

GGCGTCC-----GGCCGACCG-CCGCTCCCGCGCC---  
CCTCCTCCTCCCCGCCGCCCTCCTCCGAGGCCCGCCCGTCTCTCC---TCGCCCTCCCCG-CGC--  
GTACGCGCGCCCGCCCGCCCGGC-----TCGCCTCGCGGCGCGTC---  
GGCCGGGGCC-----GGGAGCCC--GCCCC--GCGGCCCG-----  
CCCGGCCGCGCCCGTGGCCGCGGCGCC-----GGGGTT----CGCGT-GTCCCCGGCGG-CGAC-CCGC-  
GG-----GACGCC--GCGGTGTC-GTCCGCCGTC-----GCGCGC-----  
CCGCCTCCGGCTC-----GCGGCCGCG-CCGCGCCG-CGCCGGG-G-----  
CCCCGTCCCAGCTTCCG-CGT---CGGGGCGGGG---CGGCTCC-GCC-----  
GCCGCGTCC-TCGGACCCGTCCCCC-GAC-  
CTCC-----

-----GC-GGGGGAGACGGGTCCG-----  
GGCGT-----GCGGCGCC-----CGTCCCGCCCC-----CGGCCCGTGCCCC--TCC-  
CTCCG---GTC-  
GTCCCGC-----

-----TCCGGCGGGGCGGCGC-----GGGGTGCCCGCCGCC--GCGC-----  
GCTCTCTCTCCCGTCGCTCTCCCC-----TCGC--CGGGC-----  
CCGTCTCCCGAC-GGAGCGTC-GGG-----CGGGC-  
GGTCGGGCCCGGCGCGA-----

-TTCCG-TCCGTCC--GTCCGCC-GAGC-----GGCCC-GT-CCCC-----  
TCCGAGAC--GC-GACCTCAGATCAG

PanA

TCAAT--CGCCCCC--CGGGG-----  
TGCCTCC-----GGGCTC---CTCGGGT-----  
GCG-CGGCT-GGGGGTTC--  
CCTCGCAGGGCCCCGCG-----

GGGGCCCTCCGTCCCCCTAAGCGCAGACC-----CGGCGACGTCCGCCCTCT-CTTCCCGCCGCGCC--  
GCCCCCT-CCCCC-TCCCC-  
CCGCGGGCCCTGCGT-----

-----GGTC-  
ACGCGTCGGGTGGAGGGGGGAGGGG----  
GCGCCCGGTGAGAGCGAGAGAGAGAGAGGGGAGGGCGGCGCCG-----  
CCGCCCGGAAGACGGAGAGGGG---AAGAGAGA-----GCCGGCTCGGG---  
CCGAGT-----TCCC---

GTGGCCGC-----  
-----  
-----CACCTGCGGTCCGGGTTCTCCCTCGG--GGG---  
TCCCTCGCGCCGCA---CG---CAG--CTCGGGTCCGGGGTTC-GTCGGCCCC---GGC-----  
CGGGTGGAA-----GGT--CCCGTGCC-----GTCGCCGTC-----GTC-----GTC-----  
GGCGGTGGG-GGCGTGTTGCGTG-----TGGTGGCGGGGGTGGGAGGAAGG-CGGGTCC-GGA--  
GGGAAGGGGGT----CTGGCGGGGAGAGAGAGGG---TGGGGAGCGCGTCCCGGTGCGCCG--  
GGTTCGCCGCCCG-----CCCC-TGG-TGGC--GGCC--  
GGCGTCC-----GACCGAACAA-  
CGCTCCCGCGCCCCCTCCTCCTCCACGCCGCCCTCCTCCGGGGCCCC---GTCCTCC---  
TCGCCCTCCC-----GCACGCGCGCCCGCCCGCCGCG-----TCGCCTCGCGGGCGCGTC---  
GTCCGGGGCC-----GGAAGCCC--GCCCC--GCGGCCCG-----  
CCCGGCCGCGCCCGTGGCCGCGGTCCC----GGGGTT---CGCGT-GTCCCCGGCGG-CGAC-CCGC-  
GG-----GACGCC--GCGGTGTC-GTCCGCCGTC-----GCGCGC-----  
CCGCCCCCGGTC-----GCGGCCGCG-CCGCGCTG-TGCCGGG-G-----  
CCCCGTCCCAGCTTCCG-CGT---CGGGCGGGG--CGGCTCC-GCC-----  
GCCGCGTCC-TCGACCCGTCCCC--GGAC-  
CTCC-----

-----GCGGGGACGGGTCGG-----  
GGTGTGT-----GCGGTGCC-----CGTCCCGCCCC-----CGGCCCGTCCCC--TCC-  
CTCCG---GTC-  
GTCCCGC-----

-----TCCGGCGGGGCGGCG-----GGGGTGCCGTCGGCC--GCG-----  
GCTCTCTCTCCCGTGCCTCTCCCC-----TCGC---CGGGC-----  
CCGTCTCTCGAC-GGGGCGGC-GGG-----CGGTC-  
GGTCGGGCCGCGCGA-----

-TGCCG-TCCGTCCGCGTCCGCC-GAGCGGCCCGTCCCCGCC--GCCGGCCCCGTTCCCC-----  
TCCGAGAC---GC-GACCTCAGATCAG

PanB

TCAAT--CGCCCC---CGGGGA-----  
TGCTTCC-----

-----AGGATC---CATGGGAT----  
GCA-TGGCT-GGTGGTTC--  
CCTCGCAGGGCCCCGC-----

AGGGCCCTCTGTCCCCTCAAGTGCAGACC-----CAGTGACGTCTGCCCTCCC-CTTCT-GTCATGCC--  
GCCCT-TCCGCC-TGCCCT-  
GTGGGCCCTGCAT-----

-----GGTC-ACCTGTTGGGTGGCAGGGG-  
GAAGGGG-----GCCCGGCTGG-----GAGAGAGACAGCGGGTGGCGCTG-----  
CCGCCTGCGAAGATGGAGA-GGG----AAGAGA-----GCCGGCTCTGG---  
CTGAGT-----TCCT---  
GTGGCT-----

-----GCCAC-TGCAGTCTGGGTTCTCC--GAAGGGGGC---  
TCCCTTGTGCCGCA----CC----TGGC--TT-GGGGTTTGGGGTTT-GTCGGCCCT----GGC-----  
CGGGTGGAA-----GGT--CCCGTGCCC-----ATCGTTGTTGTG-----CGTT-----  
GGTGGG-GGCGTGTTCAT-----GTGGGGGAGGAAGG-CAGGCCC-GGAA--  
GGAAGGGAT-----CGGG-----TGGGGAGTGTGTCCCGTTGCTGC--  
AGCTTGCCACCTG-----CCCC-TGG-TGGC--GGCCT--GGCT---  
GG-----CATCCGGTGACTG-CCGCTCCCATGCC---  
CCTCCTCCTCCTCGCCACCCCTAATCCGAGGCCCC----GTCCTCC---  
TCGCCCT-----CCCACCTGCCCAGC-----TCGCTTTGTGGTGC GTT---  
TTCTGGGGCT-----GGAAGCCC--ACCC--ATGGCCCG-----CCTGTTTG-  
GCTCATGGCTGTTATCCC-----GGGGTT----TGCCTC-TCCCCGGCGG-TGAC-CTGC-GG-----  
GATGCC--GCGGTGTT-GTCCGCTGTC-----  
GCG-----TGGCCGCG-CTGTGCCT-TGCCGGG-  
G-----CCCCGTCCTGAGCTTCTG-CGT----TGGGGTGGGG---TAGCTCC-GCCACC-----  
TCTGCGTCC-TTGGACCTGTCCCC--ACA-  
TCTGTGTG-----

-----GGGGACGGGTCCG-----  
GGTGT-----GCCGTGTC-----TGTCCACCC-----CGTGCCCC--TCC-  
CTCCC---GTC-  
TTCCTGC-----

-----TCTGGCGGGGTGGC-----GGGGGTGCCATCGGCTGTGAT-----  
GCTCTCTCTCTT--GCCTCTCCCC-----TTGC--TGGG-----  
CTTCTCCTGAC-GGAGCACC-GGG-----TGGTCGGGT-GGGCTGGC-  
TGGTGC GTTCC-----

-----G-  
TCCATCC--GCC-----GACCAGCCACCCCCGCC-TGCCCTGCCGTTTGCCTCCTTCCCCTGAGAC---TT-  
GACCTCAGATCAG

Macaw  
TCAAT--CGCCCC----CGGGGG-----  
TGCCTCC-----

-----GGGCTC---CTCGGGT-----  
GCG-CGGCT-GGGGGTTG--  
CCTCGCAGGGCCCGCC-----

-----  
GGGGCCCTCCGTCCCCCAAGCGCAGACC-----CGGCGACGTCCGCCCTCCC-CTTCC-GCCGCGCCC--  
GCACCTTTCCCC-TGCC-  
CCGC-----

-----GGTC-ACGCGTTGGGTGG--  
GGGGGAAGGGGGG---GCCCGGT-----GGGAGACCGGAGAAGGGAGGGCGGCCG-----  
CCGCCCGCAAGAGGGAGAGGG---AAGAGAGA-----GCCGTCTCGGT---  
CCGCGT-----TCCC---  
GCGGCCGCGGCC-----

-----GCCCGCC-GCGGCCGGGTTCTCCCTCGGGGGGGC---  
TCCCTCGCGCCGCA---CG---CGG---CTCGGGGTGCGGGTTC-GTTGGCCCG---GGC-----  
CGGGTGGAA-----GGT--CCCGTCC-----GCCGT-----GTCGCGC---  
GTCGGCGGCGGCGGTGGG-GGCGTGTGTCGT-----GGGGTGGGGGGAAGGAAGGGCGAGGTC-  
GGA-----GGGGTTGC-----GCGGGAG--AGGTCC-----GGGAGCGCGTCCCGGTGCGCCG--  
GGTTCGCCGCCG-----CCCC-TGG-TGGC--GGCC--  
GGCGTCC-----GGCCGACCG-CCGCTCCCGCGCCG--  
CCTCCTCCCCGCCGCCGCCG---TCCGCACCGCCACC-GTCCTCCT----  
GTCCTCCC-----GCCCGCCCGC-----TCGCTCC---GCGC-----  
GTCAGGGGCC-----GGAAGCCC--GCCCC--GCGGCCG-----  
CCCGGCCGCGCTCGTGGCCGCTTCCC-----GGGGTT---TGCGT-GCCCCGGCGG-TGAC-CAGC-  
GG-----GACGCC--GCGGCGTC-GTCCGCCGTC-----GCGCGC-----  
CCGCTCCCGTCC-----GCGGCCGCG-TGGTGCCG-CGCCGGG-G-----  
CCCCGTCCCAGCTTCCG-CGT---CGGGG-GGGTCG-GGCGCC-  
GCCGCCGCTGGCCGCCGCCGCCCTCC-TCGGGCTCGTCCCC--AC-  
CTCCAC-----

-----  
GGGGGGGGGGGACGGGTGCGGGGTGCGTGGGCGGGGTGTGTGGCGGTGGTGC CGCGGCC-----  
CGTCCCGTCCC-----CGGTCCGTGCCCC--TCC-CTCCC----GTC-  
GTCC-----

-----CCGGCGGGGCGGCG-----GGGGCGCCGTCGGCC--GCG-----  
GCTCTCTCTCTC-GTCTTCTCCCC-----TCGC--CGGC-----  
CCGTCTCCCGAC-GGAGCGTCCGGGCGC-GGCGGGACGGC-  
GGGCCGGCGCG-----

-----  
CGTTCCG-CC--GCC-----GACCCGCCACCCCGCCCGTGC-----GCCTCCCGCC--TCCGAGAC--  
GC-GACCTCAGATCAG

Nomascus

TCAAT--CGCCCC--CGGGGG--

TGCCTC-----

-----GGGCC--CTCGG-----

CGCG-CGGCT-GGGGGTTC--

CCTCGCAGGGCCCCG-----

-----  
GGGGTCTCCGTCCCCCAAGCGCAGACC-----CGGCGACGTCCGTCTCC--GTTCC-GCCGCGCC--

GGCCCCT-TCCCC-TCCC-

CCGCGGGCCCTGCG-----

-----  
GGTCGACGCGTGGGGTGGCGGGGGGAGGGGG--GCCCGCC-----

GGGAGAAGGGAGGGAGGGCGGCGCC-----CCGCCCGCAAGGCGGAGAGGG--

GAAGAGAGAGAA-----GCCGGCTCGG--CCGG-----TCCC--

GTGGCCG-----

-----CGAC-GCGGTCCGGTTCCCCCTCG--GGG--

TCCCTCGCGCCGA---CG---CGG---CTCGGGCTCGGGTTC-GTTGGCCT---GGCCGGC-

CGGGTGGAA-----GGT--CCCGCGCC-----GT-GCCGTC-----GTCGCGCGTCGTC-----

GGCGGCGGG-GGC-----GGGAAGG-CGAGCCCCGGAA-----

GGGT-----CTGGCGGGAAGAGGGTCCGGGGTAGGGGAGCGCGTCGCGGTCGCCG--

GATTTGCCGCCG-----CCCC-TGG-TGG--GGTC--

GGCGGC-----GGCCGACCG-CCACTCCCGTGCC---

CCTCTGCTCCCGCCACCC--TCCGAGGCAC-ACC-

GTCCTCCC-----GCCTGCCCGC-----

TCGCTTCGCGGTGC-----GTCTGGGGCC-----GGAAGCCTGCCGCCC--ACGGCCTG-----

CCCAGCCACTCGCGGCCGAGTCCC----GGGGT---CGCGT-GTCCCAGCGG-CGAC-CCGT-

GG-----GACGCC--ACGGTGTC-GTCCGACGTC-----GCGTGC-----

CCGCTCCGGCTC-----GCGGCTGCG-CCGTGCTG-TGCCGGG-G-----

CCCCGTCCCAGCTTCCA-CAT---CGGGGTGGG--CAGCGCC-GCCACCGC-----

GCAGTGTCC-TCGGGCCATCCCCGCCG-

CTCC-----

-----GCGCGTGGGGACGGTTCG-----

GGCGTGCGC-----GTGCGGCGTC-----CACCCGCC-----CGGCCGTGCC--TCC-

CTCCC----GTC-

GTCCCC-----



-----  
-----  
-----TCTGGTGGGGCGGA-----GGGGGTGCCGTTGGCCCCGCG-----  
GCTCTCTCCCTCT-GGCCTCTCCCC-----TCGC--CGGGC-----  
CCGTCTCTCGACGGGAGCGTCCGGGCAGGGGCGGG--GGC-  
AGGCCGGCGCGTT-----  
-----

-----  
-----  
CGTTCCGTCT--GCCGCT--GGCCCCCGCCCTCTGCCTGTCGGCCCCATTCCCC-----TCCGAGAC--  
GC-GACCTCAGATCAG

Microcebus

TCAAT--CGCCCC--CGGG-  
TGTGTTGCCTCC-----  
-----

GGGCTCCACCCCGGGT--CGCG-CGGCT-GGGGGTATC-  
TCTCGCAGGGCCCCGCTCC-----  
-----

GTGGGCCCTCCGTCCCCTTAAGTGCAGACCT-----TGGCGGGGCGCGCCCCACCTCTTCC-GCCCGACC--  
GCCCC-----  
ACGTAGGCCCGGCG-----  
-----  
-----

-----  
-----  
TTGGCGCGTGGGGCGGGGG-----  
TGCGGTGAGGTCGCGACCCGCC-----TCCCGCGATGAGAGAAGAGAGGAC---  
CGGGAGG-----GTC-GCTCGCG--CCGAGCTTGC-  
TCCCCTCGTGGCC-----  
-----

-----GCCACGGTGAC-GCTCCT--CTCGG--GAGC--  
CTGCCTCGCGC--TG----TG--CCGG--CCGGGCCT-----TCCCCC-----CTCTC-----  
TGGGGGGGGTCTGCCG-----GAAGGGCCCGACGGGGTTCCCGCGCCC-----  
GTCGCGCGCCGGCGAGCCTCGGCCGTGGGCGCCGGGGGGCCGGGGGCAAGGGGGGGCGT----  
CCGGGGGGTCTGGCGCG-----  
CGTGAGGGGTTGGTTCGCGCCCGGGTTCGCC-----GTCG-----  
TCCGCCGTCCGGCGGGCCCG-----  
-----

-----GCGGGCCGCGCCGGCTTTTTACCCCC---  
ACGCCGCTCCCTCTCTCGTCTCCCCCACCTCCGTCTTCCCC---C-----GGCG-----  
TCG--CCGACCGAGCGTCCGCCGGGCGC-----GCGGAGGGG-----  
CCGGGTGGCCGCCCCCGTTCGCGTTGCCCGT-TCGGGGCCGCTCCCC---GGGGC-----TGCGCCGCCAC-  
GGCGG-CGAC-CCGC-GG-----GACGCC--GCGGCGTC-GTCCGCCGAC-----  
GCGCGC-----CCGCACCGGGTCCCC-----GCGGCC---CGCCGCC---CGTA-  
G-----CGCGTCCCAGCCCGGTTG-----CGGGGCCGGT--CGGCGCGGTTA-----  
GCCGCGTC--  
TCGGCCGTCTCCCCCGCCCCGGGGGTGGGCGCCCGCTCGACG-----  
-----

-----  
CCCCGGGAGGGGACGGGGAGGAAGAG-GGAGCG----  
TTC-----  
-----

CGCTCCCTCCCCTCCTCCGCGCCTTCCCTCCCCGACGCGTTGCGGGTGCCGCCCCCCCCGGGGGTC-  
GCGGTGCGGTGAGAGGGC---GGTTCT---CTCGTGCCGCCGG-----CCCCGGGTCC-GCGCC--  
TCGCCGTCCGTGC-----TCC-CTCCC---GTC-  
GTCCCCGCGGCCTCCGACGGCGCGGGCGGCCCTCCTTCCCTCCTCCCCGGCCCCCGCCCGCG-----  
-----

GTCGT-----  
CGCGGGTGACGCGGCGCCGGGGAGAGCGGTGTGCGGAGGGGGCGCCTCGCGTCGGAGGGGGCCGGCCTGGGGGGC  
GGCGGTGACCGTGGCCGGCG-----TCCCTCCGTGCGCGCGAGCGGGCC-----GCTCTCCC-----  
GCCTCTCCTCCCTCGCCTTG-----TCGC--CGAGCGCC-----CGGGCGCGC--  
GCCGCGCG-----  
-----

-----CGTT-----GCGCCCCG-----  
GCCTCCCC-----TCCGAGAC--GC-GACCTCAGATCAG

Otolemur

TCAAT--

CGCCCCTC-----  
-----

-----CGGGGT---GCG-CGGCT-GGGGGTTGC-

CCTCGCAGGGCCCCGAGA-----  
-----

CGGGTCTCCGTCCCCCTAAGTGCAGACCTC----TGGGC--GTGCCCTCCGCCGCTTCC-GTCCC-----

GGCC-----TCCC----

GTGAGCCC-----  
-----  
-----

-----AGT-----GGTGGACC-----

GTGGGGG-----TGGGGCGTGGCGGGGCGGCGCTG-

CC-----GCCCGCAGCGGGGCAGGA-----GAGAG-----

ACGGG-----GGGCTT---TCCC---

GCGG-----  
-----

-----TCTCTCC-GGTCC--GTTT----CTCGG--GAGC---

CGCCTCGTGCCGCG---CG---CGG---ACGGGGCCGCACG-CCGCCACCCTCCGC-TAAC--GCGGGG-

GTGGGGGTTTGGCCTT---T---GCCGCTGGGG-----CGGGCCCGCGGGT--

CCC CGTCCGTCCGTGCGTGCCTGCGTGCCTGCGCGGTGAGGCGGGGGTGGGGTCTGGCCGGCGTGGCGTCTGT

CGTGGGGGTCTTTGA--

GAGTCGTGAGGTTGGGGGAGGCGCGGGGGGCCGGTTCGCGGCGGTTTCGCCGCCAGCCCC-----

CGG-TGG-CGGCTG-----GGGC-----

GACCCGGCCGGTC-----  
-----

CTCCCTCCCCTGCTCCCCTCTCTCCCCGTGCGC-----GTCTTCC----GTCGCGCCGC-  
ACCCCGCCCCCCC----TCGGCCGCGGTGCGCCGTGCGGGC-----GCGGGAGACAACCC--  
GCC-----GTCGCCCCGT-CGGGGCCGCGCCCC--GGGGC-----CGCGT-GTCCC-  
GGCGG-CGA-CCCGC-GG----GACGCC--GCGGCGTC-GTCCGCCGTC-----  
GCGCGC-----CAGCCCTGGTGTC-----GCGGGCGCG-CCGGGCCTC-  
TCCGGG-----CCCCGACCTCCCCGGC---  
GCGGGGGCCGGAGAGTTTGGCGGTGTGAGCGGCCCGG-----  
GCCGGGCCGGGCCGGGATGGCGGCGCGCTGTTCG-----

-----CGGG-----  
GCCCCGGGTGTCGGG-----  
TCCGTGCGGGCGGTGGTTCGGGGGCCGCCGGCGGTGCGGGGGCTGACCGCCGGCTCAAGTTCCTCCCCTCTGCCGTC  
CGCGGGCCCCACCCTCCCCGTGACGCCGCGCGGTCCCCCTCCGTGGGCCCGGGCCCGGGCGCGGGCGCTCCGCT  
CTCGCTCTCC-GGCTC-GCG----CCGCCGGCTCGTGCTCC--GTCGCTGCC----GTCTCC-  
GCGACCCCTCGGTTGCCTCTCCGCCGTCTCCGGC-----CGGCCGCGCGCACGC-  
TCTCCGC-----  
GTGCG-----GCGCGTGTGTGCGGGG-  
CGGCGTCGGCGGGCGGCGCT-----  
TTGCCGGGGCCGCGGGGTGCGCGGT-----GTTGACTGCGGTGCAGAAAG-----  
GCG-----GCCCTTCTCTC--GGTTCCCCGTTTC-----TCGCTC-TGGGC-  
C-----CGGGC-----GGGCGGGC-----GGGCGGGCGTGT--GGGCGG-  
GGCGGTC-  
GAGGCTCC-----

-----GGCTGTCGCCGCC---  
CGCCCCACCCTCCCCTCAACCGGCCCGTGGTCTCCCC-----TTCGAGAC--GC-GACCTCAGATCAG

Tupaia

TCAAT--

CGCCCCCG-----

-----TGGGGT----GCG-CGGCT-GGGGGTTC--

CCTCGCAGGGCCCCCG-----

TCGGGCCCTTCGTCCACACAAGTGCAGAACT-----TGCGCCTTCCGGCCCC--CCCTCC-GCCC-

ACCATCCGCACCCCTCC---TGCCCTC--

CGGTCTGTCCACCC-----

-----GT--GGGCAGCCGTGTTGGTGGGG-----

GTGGGGCAG----GCCGGTGGC-----GTGGGGGGTGGTCCGATTGGCGCGCGTC-----

CCCGCGGAGAGAGGAGGCGAGGGAGAGCCGGCCGTCC--CCGTCCGGGAA---GGGGCTCGCG---

CCGAGC-----TCCC---

GTTG-----

-----ACCGTGCCACGGTC-----TCCCTTCGG--GGC---  
GCCCTCGTGCCGCA---CA---CGGTCCCTTGGGC-----CGGGTCCCACCCC---CGCTCGGGCAT-  
GGGTGGGGCGCGCC--GT--CCCCTGAATC-----GCGCGTCGCGGT-----  
GGCGGGGTCGCGCGGTTGTGGTGTGAGCGGTGTGTGGGGAGGAGCCG--CGGACGGCCGGGA-----  
TCGGGGCGCTTCCCCTGGAGTCGCTCCGCGCCCCCGG-----  
-----CGGC-----  
GGCCCTCGGCCGTCCCCTGTCCC-----  
GGTCGACCTTCTTCCCCCGCCTTTCCTCCTC-----  
CCACCCGC-----GTCTCCCC---  
GCTCCGCTC---GGCGTTCGCGGGCACC--GGCGCGTCCCTCGCCCGGGCG-----  
GCCGCGCTCCCAGGCTGGCTCGTGCCGTGGCCCG-----GTCGC--GCGC--GCGGCCGTGCC-----  
GGAGCG--ACGCGT-GCCCC-GGCGG-CGGC-CCGC-GG-----GAAGCC--GCGGTGTC-  
GTCCGCCGAC-----GCGCGC-----CGTCCCCCGCGGCCTT-----  
GGCCGCGTTGGCGCCG-TGC-----GCCCCGAGCCCCGCGC--  
GGTGGGGGGCCTCTCGGCGGGTTGGCG-----CGGGGGCCTTCCGTGTCCGGCGGGCCGC-  
TCGCCCC-----  
CTCCC-----  
-----  
CGGGGG-----  
-----  
-----  
TGTGCCGTGGTCCGGCCGGTCCGCCCCCTCGTTTCCCGTCGAGGTGCTCGCTCCCCCCC--GC-CCGCGG--  
CCGCCGGCCCGTGCCCCGCGTCGGTCC-----  
GCTCCCTCCTCCGTCCCCCCCCACCTTTCGCCCCCGCCGTCTCTCTCTCTCCCCACCGTGTCTCTCCGCAC----  
-----CGGTCCG-  
GTGCGGGTGGTGGGGCGGTGCGGACGCGCGTACCGCGGGCGTTTCGGTGTGGGGGGGAGGTACGGAGAGCGGG  
GCGGGCGTGGAGCC-----GTGCGAGCCGGCGCGTCCGGCCCCCTGCCTCTCTACC--CCGTGAGGGT--  
GTGCGCC-----G-TCCTCCCTCCCT--CTCTCCCTCGCC-----TCGCC--  
CGGGC--CCGTTCCGGGCGTCCGGGAACGGAGGTGTC-  
GCCGTGTGGCCGACGGAAGTCCGTCCGCGAGGGGTCCGCGTCCCGGCGTGTCTTGTGCTGTTGCGTTCCCGGGC  
TCGGCTTCGGGGGCCGGTGTGTGTGGGGCCGGCTCGGTCCGGGGCCGCGGGGGGTTTCCC-GTC-  
GGGTCCCCCGCCTTCCCCCGCCGCGCCGCTTTCCTCCCTCCGTGTCCCCGAGCCGCCTGTCCCGTTGGC  
GCGTGCACGCGC-TCCTGGCTCGCGCCCGCCCTCCGCGCCCGTCCGTCC-  
GGCCCGCCCGGCGCCCGCCCGTCCCGGCGC-TCCCCC--CTCTCCGAGAC--GC-GACCTCAGATCAG

Rat

TCAAT--CGCGCCCCCTT----  
GCGGTTTCGCC-----  
-----  
GCCGCGGGGGGATCGCGT--CGCG-CGGCT-GGGAGTCT--  
GCTCGCAGGGCCCGCTCCC-----  
-----  
CGGGGCCCTCCGTCTCCGAAGTTCGACGT----GGCGGCGTCCGGCGTTCGCC-CGC-  
GCCCGTGGGTCCGCGCGGGCTCGTCTCCCTGCCCGCCGTCGT-----  
GTGCGGCCGGGCGGCCCTCCT-----CGCGGCTCCTTCCCCGCGCGTCCGCC-  
GCTCCCGTCCCGT-----CCTCGC-----

CCGCTC-----TCCCCG--  
CCGTGGGAC-----

-----  
GCGTCGGCGGGCCGGTCCGGTGCTGGGCGCGGAGAGGGGGGGAAAGTCGCGTCGCCGGGGTCGTTGCCCGCGC  
CTCCGGTGGGGTGGGGGC-CGGA--CCCCGCCGCGGGGCCGCGC-GTCCGCCGCCCGCGCGCC--  
GCCCGGTGCGTGCGGAGAGAGAGAGAGAGAGACCCGCGAGGGTCGTTG-----  
GGGGGCCGTA-----

-----CCGCGCCCGCGGGCC---GGTC---TCGCGTCCCTCTCCT-  
CCCCGC--TCCCTTACC-----GGGGC-----CGACC-GCTCC-GGCGC-CGGC-CCGC-GG-----  
CGCC--GCGGCGTCCGTGCGCCGAC-----GCGACTT-----  
GCCCCGGGATGTGGGGCCGGCCGCGAAGGAGAGG-TCGCGGGCT-----  
CCGGCCTGGC-----

-----TCCCCGGCGCCCTCGCC-----CGTCGTCCCCG-----  
TTCTC-----GCTCTCGCTCTC-----CTCTCCTCTCCTTCCG-----TCGCC-  
CGCGCGCGCC-----

-----ACCTCTCCTTCTCCTCTGACC---GC-GACCTCAGATCAG

Mouse

TCAAT--CGCGTC--ACCC--GC--  
TGC-----

-----GGTGGT-  
GCTGCG-CGGCT-GGGAGTTT--  
GCTCGCAGGGCCAACCCCC-----

-----  
AACCCGGGTCGGGCCCTCCGTCTCCCGAAGTTCAGACGT--GTGGCGGTTGTCGGTGTGGCGCGCGC-

GCCC-----  
GCGCGGAGCCTGGTCTCCCCGCGGCACCCGCGC-----  
CGCGGCTTCTTCCC-----GCTCCGCCCGTTCCCGCCC-  
TCGCCCCGTGCGCCCCGGTCCTGGCCTCGCGTCGGC---  
GCCTCCCGGACCGCTGCCTCACCAGTCTTTCTCGGTCCCCTGCCCCGTGGGAACCCACCGGCGCCCCCGTGCGCC  
CGGGGGTGGGCGCGTCCGCATCTGCTCTGGTCGAGGTTGGCGGTTGAGGGTGTGCGTGCGCCGAGGTGGTGGTCCG  
GTCCGCGCTGCGGCCGCGGGGTTGTCGGGGTGGCGGTCGACGAGGGCCGGTCCGTGCCCCTGCGGTGGTTGTCTG  
TGTGTGTTTGGGTCTTGCCTGGGGGAGGCGGGGTCGACCGCTCGCGGGGTTGGCGCGGTGCCCCGGCGCCGCGC  
ACCC---TCCGGCTTGTGTGGAGGGAGAGCGAGGGCGAGAACGGAGAGAGGTGGTATCCCCGGTGGCGTT-  
GCGAGGGAGGGTTTGG-  
CGTC-----  
-----  
-----CCGCGTCCGTCCGTCCCTCCCTCCCTCCG-  
TGGGC---GCCTTCGCGCCGCA----CG----CGG-  
CCGCTA-----  
-----  
-----  
-----  
-----  
-----  
-----  
-----  
GGGGCGGTGCGGGCCCGTGGCCCCCGTGGCTCTTCTTCGTCTCC--GCTTCTCCTTACCC---GGGCG----  
GTACCC-GCTCC-GGCGC-CGGC-CCGC-GG-----GACGCC--GCGGCGTTCGTGCGCCGAT-----  
GCGAGTC-----  
ACCCCCGGGTGTTGCGAGTTCGGGGAGGGAGAGGGCCTCGCTGACCCGTT-----  
GCGTCCCGGCTTCCCTGGGGGGG-  
GTCCCGGCGTCTGTGGGCTGTGCGTCCCGGGGGTTCGCTGTGAG-----  
-----  
-----  
TAAGA-----  
-----  
-----  
TCCTCCACCCCCGCCGCCCTCCCCTCCCGCCGGCCTCTCGGGGACCCCT-----GAG----  
ACGGTTCGCCGGCTCGTCTCCC-----  
-----  
-----  
GTGCCCGGGTGGCGTCTCTTCCCGCCCGCCTCCTC-----  
GCTCTCTTCTTCCCGCGGC-----  
TGGGC-----  
-----  
-----  
-----GCGTGTCCCCCTTTCTGACC---GC-GACCTCAGATCAG

Hamster



ATCTCTCGCCTCTCCCCTTGCAAGCAAGCAAGCAAGCAAT-----

CCATTCTATTTCTCTCTC-----GCTTCTC---GC-GACCTCAGATCAG

Cavia

TCAAT--CGCGACC---

CGCGGGTTGT-----

CCCCCGGGGT---CGCG-CGGCT-GGGGGCTT--

CCTCGTAGGGCCCCGCTTT-----

GGCGTGCCCTCCGTCCCCCTAAGTGCAGACC-----CGGTCGGCGC-

GCGCCTGCCTCGCCTCGCCGGCCGCCGCCCCCCCCGAGCTCAGCGCCCCCCCCAGCCCCCGTCGCC-----

CGTC-----

GGCGTGCGCGTTGGGGGGTGGTGGTGGCCCGAGGGGGAGCCGCGCGTCGCGTGGTGCGGTGCCGCCGTCCGG

CG-----CAGAGAGGGAGCGGTGTTCCGAAGAGAGAGGGGCGAGCGAGA-----GGGC-

GTGCCCGAGGTGTCGGTGTCCGGGAGGGCGGGCGGTCCGGGGTCCGGGGTTCGGGGTTCGCGGCTCGCGG-----

TGAGC-----

CCGCGGGCCCCCCCCCGCGCCGTCCCGTGT--CCGCCGCC-----

CCTGGCCGCGGTCCCTCCCGGTGGAGGAGGGGTCCCTCGCGCCGCA----CG----

CGGGTCCCGG-----

AGAAATGTGTGCCCCCCCCCGCCGGGTCCGGCTCGCGT-CGAGGCC-----CGTGGC-----GCGTGT---

GAGGCCGCGCCCCC-GGGGTCC--GCGTT--GCC-CGGCGG-CGG-CCCGC-GG-----GACGCC--

TCGGCGTC-GTTCG-CCGTC-----GCGCG-CTGCGCC-----CGGGG-CCGCGCGT---

GGTCTCGCCGCGTCCC-CCGTCAAGTGGGTTGGTCCCGAGGCCCGCCTCCCCTCGGCGGGA-----

GGCGGACGGTGT-GGGGGTTCGAGGCGGCCGTGGTCCGTCGCCGGCCGGCCGGCTGCGCTGAGGGGTCCGGT-

GGCGTCTCGGTCGTCGCCGCC-----

GTGCCG-----

GCCGCGCCGCGCGTGCCGTGCCGTGCTCTCCCCCCCAC-----

-----GTTGCCGCTCGGCGGGTGGTGCGGTCCGGTTCGAGCCCGGTGTCCTCC-



GGCTCC-  
GTGCCCTCCTGGCTCGCCCGGTCTCCGGCTCCACCGCGTCGCCCTTGTCTACCCCTCGTCTCCGTCCGCTTCCCT  
CCCCGCCCCCTCCGCCGCCACCGCTTCGG-  
GGCGCGTGGCGACGTGTGGCGGTGGTGGTGGGGTGGGTGCGGTTCCGGACGGTGGGGGAAGGCGGGCCCCGCGGTG  
CCCCGGACCGCGCGGGCGGGC-----  
GTCATCGGGTGTGCCGTGGCCTCTCCCGCGCCGCCCTCCACCTCGGGGTTCGCGCGGGCGACCGTGCTGCGCCG  
CGCCGCGTCCTTCCCC-----  
GCTCCGCCTCTCTCTCTCTCTCTCCCGCCGCCGCCTCCTCCTCTCCCCGCTG----  
TGGGGTTTTCCGGCATTCACTCCCGGGTGAGACGACCGACGGCGAC-----  
-----  
-----  
-----  
GCGAGACTCTCGCGTCGCGTCTCGGTCTCGTCTCCCCCT-CCC-TCCGAGAC--GC-----

Diplo  
TCAAT--CGCCCC--CGGGGGT----  
TGCGT-----  
-----TGCCCCGCGGGGT---

GGCG-CGGCT-  
GGGGGTGTCCCTTCGCAGGGCCCCCTTTCC-----  
-----

GGGGCCCTCCGTCCCCCTAAGTTCAGACT-----  
TTGGCGGTC-----  
-----  
-----  
-----  
-----  
-----

-----CCGTC-----  
TGGCTTTTAGAGCGAGCGAGCGAGCGGTATCCCGCGGGGTGGTATCCCGCGCAGGAACGAGCCCGCGGCCGGGT  
CTTGTCTGTCCCGCCCCCTCCCCACCGTG-----  
-----

TTC-----  
-----CGCGGTGCCCGAACCAGGGGGATGACGTTT-  
TCGCGCCGGG----  
CGCCC-----  
-----  
-----  
-----

GAGTCGGGTCAGGGCGGCCCGTCCCGCGGCCG-----CCGGCC----GCGAGCGAG---  
CGCGTCGCGGGCTCCCGTGCCCGC-GGACTC---GCAC---GCCG-AGGCGGACGGTCCCGC-GG-----  
GACGCC--GCGG--TC-GT--G-CCGTCCGCCAGACGCGCGGTCTTCCG-----  
CGGGGAGGGTTCCCC-----

GCGCGCCGCCCGCGTTGCCGTTGCCGGCCCCGGGTCCCGCCCGCGTCCGTCCCCTCTC-----

-----

-----

-----

-----

-----GCGCC-GGCTC---

GTGTCCCACCCCCGCCGTCT-----

-----

-----

-----TCGTGCGGGCCGCGGGGCC---

-----GGCTCTCCCCCTTTGCCGCCGCG--G----

-----

-----

-----CTTCCTCCCTCCCTCCCTCCG---

-----

-----

-----

-----

-----

-----

-----

-----

-----

-----

-----

-----

-----CGGATGTGGCCGCCGTCGCCGCCGCCGCCGCCGCCGCC-----

-----TGCGCGCTTGCTTCCGG--

-----

-----

-----CCGTCGG--

-----GGC----GAGGGCGTTCCGGTGTG-TCGTG-

-----GCGCCGGTC--

-----

-----

-----

-----

-----

-----

-----

Sperm

TCAAT--CGCGCCCC--

CGGGGGTTTGGCTC-----

-----

-----

-----

-----

-----

-----

-----

-----

-----

-----

-----

-----

-----

-----

-----

-----

-----

-----

-----

-----

-----

-----  
-----  
CCGCCGCCGCGCGGCACGGGCTGGCTCGGACATCCCCGGTCACCGGTCACAGTGCCCCGCGCCCCGCCCGGGG  
TGGTGACGCGCCTGCGGAGGAA---GGCGGAGTGTGGCCGCGCCC--GGGGAT--GCGT--GCC-  
CGGCGG-CGAG-CCGC-GG----GACGCA--GCGGTGC-GTCCG-CCGTC-----  
GCGCGTTTTCCCTC-----CGGGTCGCGGAC-----  
GCGCCGCGCCGCTTCCCCCGCCGTGTCCCTCCCGCGCCGGCTCCTCCGCACGG---  
AGCCGGCGAGCGGCGGCGGGGAAGGAGGTCGGAGCGAGCTCGC-----  
-----

-----  
-----  
GAGGGCGTCTCCACAGGTCTTGCCGCGCGCGGTTGGAGGTTGCCGCCGCCGGCATGGCGTGTGTGTCGGTGT  
GCTTGGCCCTTTTTCGGCGAGGGATTTGAGTCGGGAGCCAGCGCCCCGGCGTTCGAGGGCGACCGTCGAGTTCC  
CGCCGTGCCCGCG---CCCCCCCCCGCCGTGTGAGCCTCCCGTCCGTCCGC-  
GGCTCCCGCGTCGCCGTCCGCC-----  
-----

-----  
-----  
CCGACGCCGTGCCGGCCGCCCTCGCCCTCGTTCTTCTCCTCTTCCGCC-  
CCCGGTGGGGCGCCTCCT-----CCCGGAGGCCCTC-----  
GTCGGCCCTCCTGTCGTCTGTGGCCTCGGGCGGGCCCCCGTGTGTCTCGGGGAAGGAACCCGAGCGGGGAG  
CCACG-----  
GCTCTCCGC-----  
-----  
-----  
-----

-----  
-----  
---GCCTCCTCCGCCCTCTCTCGATTC---GC-----  
-----

Ocho  
TCAAT--CGCCCT----CGGG--  
TGGGGTTGGGCTC-----  
-----TCGTCTCCCTCCCCGGT---

CGCG-CGGCT-  
GGGGTGTGTGCTCGCAGGGTCCCCTTGCCCCTC-----  
-----

GGGGAAGGGCCCTCCGTCCCCCTAAGTGCAGACC-----  
GGCGGTGGGGCTCCGGTGCCTCG-----  
-----

CTC-----  
-----  
-----

-----TCCGGGCTCCGCGGTGCCGCC-----  
GCCTGCC-ACGAGAGAGCGTCTTGTGAGTGTGCCGAGGTGGGAAGAGAGAGCGTGTGCGCGCG--  
CGCGAGGAGGAAGGGCTCGCCGGGCGTGTGAGGAGAGGAAGGCAGGGAAGGGGACTCGTGGGGTGGTTGGG  
GGAAGTGAAGCTCGCGGCCG---  
GTGACGGCGCGGGGTCCCCACCCCGCCACGGTCTCGTGCCTTGCCGCCCTGTTCCCCGTGCGTCTTCCCGA

GTCCCGCCCCGTCTCGCCGCGTCCCGTCCTTCTCTTTCCCCCCCCGACCGCCCTTCGGGAGG---  
TCGTTTCGCGCCGCA----  
CGCGTGTGGTTCGGTTCGTCGCGGGGGTTCGAGGCTTGGGGGCGAGGGTGAGAGGCAGCGC-  
GCGCCGGGAGCGGCGCCGGT-----  
CTCC-----  
-----  
-----  
-----

GACCCTCTCCGTTCCCGGTTTCGGCTCGCCCGATCCCTCCTCCGCCCCGAGACCCCTCGCCG--  
CGAGGCCGGTCTGACCTGGCGCGTGTGTCTTGC GCGTTTCGCGCCC----GGGGAC---GCGT---GCCC-  
CGGCGG-CGA-CCCGC-GG-----GACGCC--GCGGTGTC-GTCCG-CCGTC-----  
GCCCCGTCTCGCCC-----CGGGGGGTG-T-----  
GCGCGCTGG-----CCCGCGCC-  
GCGCCGGCTGGCCGCCCCGCCGAGCCGCCGCCACCCACCGCC-----  
-----  
-----  
-----  
-----

TGCC-----  
-----  
-----  
-----  
-----

GGCGGAGGCGCTGGCTGGCTGGCGGGCGGGCGGGCGGGCGGGCGCGGCCCGCGCGCTCCTGCTGCGGCCGTCCC  
TCCCGGCCTCCGTC-----GCTCTCTCCGTGG-----  
CGCTCGG-----  
-----  
-----  
-----

-----TTGTCTTCTTTCCC--TCCCTCCCTCCGAGAC---  
GC-----

Orycht  
TCAAT--CGCCCC----CGGG---  
TGGGTGCCT-----  
-----CGCGCCTCCCC--

GGGTT---GCG-CGGCT-  
GGGGGTTTCTGCTCGCAGGGTCTGTA-----  
-----

TTCTTTGCCCTCCGTCCCCCTAAGTGCAGAT-----  
GGTGGCCCACTGGCCCCGACTCCACCCTCCCTCTGCTCGTCTCGCGACTGTCCC GCGGCCACCGCCCCCTTCC  
CCCGTGCCGCTCCCTCCTTCCCCGTGCCCCGCCGCCGCCCTCCCGTCCGGCAGGGGGCCTCCCCACGCGCC-  
-----

CTAGT-----

-----  
GGCGCGGAGGTGGTTGTGCCACCCCGCGGGAGATGGCGTCTGGGTGGCGGGGCGGGGAAGTGGAGGTGGGTG  
TGGGGGGCGGGCAAGGCCGACGTGGGGGGCATGGTGCAGGGGAGTGGGGGGCGTGTCTGCGGGCTGTGGTGCCG  
GCTGCC-----AGCGAGAGGTGGTGA-GCGC--GGC-----GTGTGCGT----  
TGGGGG--  
GACCGAGGCCGCGGAATCGGTAAGGGAAGCGCCCCACGCCGTCT-----  
-----

CGGC-----  
-----GTGGGTCCCCCGCGCGGTCCCCGTCCCTCCATCGGGAG-  
AGCTCGTTCGTGCCGCG---CGC---GGTC-----  
GCGGCGGGGGGAGAAGGGGGTGGTGGCGGCGCGGCGA-----  
GCGCCGGGAGCGGGGTGGCAGGTGGCTGTCTCCTCCCCCGCGGTGTGCGC-----  
CAG-----  
-----  
-----

-----  
GTGCGCCTCGGCGGGGGTTCAT---  
GGGGAGGCCCGGGCCTCTCCGCCCCCGCGCGTCTCGGCGCGCCGGCCCATGTATCCATCCGTCCTTCGCTCCC  
GCGGCGCCGGGGTCCGC-TCGTG--CCGAGGCCGGGTC-----GGCGCGCGTGT----GGTCGCGCCTC---  
GGGGAT---GCGT---GCCC-CGCGCG-CGG-CCCGC-GG-----GACGCC--GCGGCGTC-  
GTCCGTCCGTC-----GCCCGTCTACCCT-----CGGGGGGTGCTCCC---  
GCCGCTCCGCGG-----  
CCCCGAGGAGACCCCGGCCT-----  
-----  
-----  
-----  
-----

-----GGCCGTTGGCGT-  
GGCTCGTGT-----  
CTCCCGC-----  
-----  
-----  
-----

---  
TGCCCCGCTCCTCTGCCTCTCCCTGCCTGCC-----  
-----  
-----  
-----

-----  
-TTCCTTCCTTCGTCCC-TCCCTCCCTCCGAGAC---GC-----  
-----

Dasypus  
TCAAT--CGCTCCCC--CGGGG-----  
TGTGCCG-----  
-----GCGAGCGCGCCTCCCCGGGGTT--



-----  
-----GGTCCCCGCCGGCCGGCCCCGCCCTCCGAGAC---GC-GACCTCAGATCAG

Choleops

TCAAT--CGCCTTCCG-

TGGGGGGGGTGTG-----  
-----

AACGCTCCCCCGAT---GCG-CGGCT-

GGGGGTTTGCCTCGCAGGGCCCCCCCCCGCTTT-----  
-----

GGCGGTGGGGCCCTCCGTCCCCCTAAGTGCAGACC-----CGCTG-

CCGCCCCGTCCGAGACTCCCCCGCC-----  
-----  
-----

CCGCGTC-----  
-----  
-----

-----GTGCGGGGGCCGGGGTGTGGCGCC-----

GCTCGGAGAGCCGAGA-----GAGA-----GTG---

CCGGG--

GCTGGTCGTGGACC-----  
-----

-----GCCGCGCCCC-----TTCGG--GAGC--

GCCCTCGTGCCGA---CG---CGGTCT-----GGG-----GTCGCCCT-----GGCAC-

GCCGGCGCTGCGCGGTCCCCGTGTCCCGCGTCGGTCCCGTGGTGGGAGCAAGG---

GTCCGGTTCGGCCGTGAGCCGTCACCCG-----  
-----  
-----

CTC-----  
-----

CGGGTGGCGGCCCGGTGTTCCCCGTCCGGGCCCCCCACCCCCACCCCGGCCCGCGGTGTGTCCGGGGCCCCGCC

CGTGCTCGCCGC-CGCGCCTTGTGCGT---TGTGGAGGCTTC---GGGAC-----

CCGAGGCCGA-----GCGCGTGC---CGGAGA---TGCGCCCC---AGGG-----ACGCGT-GCCCC-

GGCGG-CGAC-CCGC-GG----GACGCC--GCGGTGTC-GTCTGCCGCT-----

GCGCGCTTT-----CCCCTGTGCCGCC-----GTCCCCGCG-CCGCGCCGGCC-----

CGTGT-----GGCCTGAGGT---GACGT---

TTGGGGCCGTGGGGACGGCGTCGTTGCGGGCGCGGGGCGAGAGCGGAGGTCCGGTGGGCGGCC-----  
-----  
-----

CCGGGT--

CCCG-----  
-----  
-----

ACCCTGGCGCGTTCGCGGGGCCCTCCGTGCACGAACGCGTGCCGGACGGTGTCCCCGGCCCCGGC--

CCCAGCGCAGGG--TCCCGCTC-GTG----CCGCCGGCTCGTGGCTCCC-----

GCCCTCCCGCCCTACCCCCGCGCCCGCTTCGCAACCC-----

-----  
GCC-----  
GGGGGATCGGTGGAGCGCGGGTTGGGGGGGTGGTCCC--  
CCACACGGGCATGGGCCGCGCGGTCTCGGCCACCCAGCGCCCGCCTCCC-----GCGCGGTCCGTCCG---CG-  
TGTCTCCC--GCTCTCCGTCCGCGTCTCTTCTCGCCTCCTC-----TCG----CGGGC-  
CCTTCCGTCCGCGTGGC-  
GGGCCGCTCGACGGCGCGTCCGCGGGTTTCGCGGGGAAGGAGG-----  
-----

-----  
CTG-----  
-----GCCCTCTCTCCCCGCGGCCTCGCCCCGCCGCTCCGGCGCCC-  
TCACGCGTCTCCCCTCCCGAGAC--GC-GACCTCAGATCAG

Echinops

TCGAT--CGCTCCC--TTGGGG-----  
TTGCC-----  
-----GCCCTGGGGGT---  
GCG-CGGCT-  
GGGGCCCTTGACTCGAAGGGCTCT-----  
-----

GCCCTCCGTCCCCCTAAGGACAGACCAG----  
CGGTGCCCCGCGGGCGGTGCTTCTCGCTGCCGGCCCTCCCCGTGCCTCGGCTCTTTCCCCGTGCCCTTGC  
CGCTGGC-----  
-----

-----  
TTT-----  
-----

-----  
GGCTTGTGGCGGGCGTCCCGGGGGTTGGGTTGCTTGTGGCTTTGGGGGGCTGGGCTGGGCGGCGGGGGGGTTTGG  
CCTTGGCGGTTTGGCACCG-----  
CGCCCGCAGAAAAAAGAGAGCGGAGCG-----CGAGAAGCA---GCTCGCG---  
TTGAGGTT-----  
-----

-----GCCG-----CCT--  
GGGAGACC-GTCCTCGTGCCGCA---CG---CGGATCC-----TCGGG-----GTCGCCCT-----  
GGCAC-CGTGT---AGGGGGGACCG-  
GGCGCTCACGCTGTGGTGTGGTGGTGGTTGCGGAGGGGAGAAGGGCGTGTCTTCC-----  
CGGAAAGGTGGTGTGAGGAGGAGAGGTGGGGGGCGTGCCCCCGCGTCCGCGGCCCTCGTCGCCCGACGCCA--  
-----

GCCCC-----  
-TGGCGGGCGGTTCCGCGCGAGTTGCCCGGCTCGGTCTCCCTGCCCTCCTCGAAGTCCCTTTCCGGTCCGCC-  
GTCTTGCTCCTCTCTCCTCGCCCCCTCCGCTCGCGCGCCCGCCGCTCCTCGTGCGCGCCTTGTGGGGCC  
---GCT-----CCGGCCCTTGCCGC--GCGCGCGT-----CGGG-  
CTGTGCCCC---GGGTT---ACGGGT-GCCCC-GGCGGGCGGC-CCGC-GG-----GACGCC--GCGGTGCC-  
GCCTTCCGAT-----GCGCGCCTCT-----CCCTCGGGTCGC-----  
GTCCCCGCG-TCGT-----GCCGGCGGGGCTCGT-----



CCCGGCCGGGGTGTCTGGCCGCTCGCCCGTTGCCGCGCCGGGCTCGGACGGTGTGGCGGGAGGAGCGGGTG  
TCGGTGCCTGGCGGGGGCGGGTTCGTT-----

GTCGCGGCCG--  
GGG-----

GTGGCCGCGACCCGTTCCCGTGGCTCCGTCCGCCCCGCCTCAACCGTCCCCGCACGTCCGGGCCCGGTCCGCC  
GGTAACCGCCGGGGCGGCC-GCCGGCTCTCC-TGCAGGGCCTCC-GCTC--GG----  
CCGCCGGCTCGTGGTCCCC-----  
GTCGCCGCCCTTCCACCGTCCGTCTCCCCCCCCG-----

CTCGT-----  
-----CGTGGGCGGCGTGGGCGCCGGGGTTGGGCGGTG---  
GCTGGGCCGCGCCTCTCGGGGTACGCGTGT-----  
GCTCTCCGCGCCCGCTCTC-----TCGC---TGGGCTC-  
CGTCGCGTTGGCGATCGGGCGTGTGGGTGTTTTGGGGTCGCGCGCGTGGAGTTTCTCCGGCCGTGCGTGTAGTT  
TGGGTGGCGGTTGGGGGTGCG-----

TTCC-----  
---  
CGGCCCCCTCCCTCCCTCCCGGCTACCTCCGCGCCGCTCCCCGCGACCCGTCCCCGTGCCCCGCTCGCCCCTC  
GCTCCCTCCGAGAC--GC-GACCTCAGATCAG

Loxo

TCAAT--CGCCCCCC-CGGGGT----  
TTGCCCGCCGCCAGCGT-----  
-----CTGGCCGGCCCTCCCTCCCCGGGGGT-----

GCG-CGGCT-GGGGGCTT--  
CCTCGCAGGGGCTGGCCGGCCGGCCCGCCGACGCCCGGCCAAG-----

CCTGGGCGGGAGGCGCGGGCGGGCGGGTCCCTACGACCCCTAAGGACAGACC-----  
CGGTGGTGCCCCCGTCCGCCCCCTTCCCTCCGCGGCG-----

GCGGAGGAGGAGGAGGGGGCCGGGGCCGCCG-----  
CGCCCCGAGAGAGAAGAGAGAGAAGCGAGG-----CGAGA-----GCTCGCG---  
CCGGGGTC-----

-----GTGG-----  
CTCGGGGGCCC--TCCCTCGCGCCGA---CG---CGGCCT-----CGGG----GTCACCCT-----  
GGCGACGGGGGGGGTGTGTG-CTCGCC-GGGGG-  
AAGGCGGTCCCGCGCCGCGCGGGGGCCGGGGAGGGGCGA-----  
CGGGGAGGGGAAGCGGCGTCCGCGTCCGGGGCGCCCCGTGGGCCCGCCG-----

-----  
TGCCCC-----  
-----GGCGGTGGCCG-  
CGGGGACGTCCCGGCCGGCCTCCGTCTCCTCCGAGCCGCTCTTCCCCACGGTCC--  
GCCGCGTGTCCGGGGCCCGCCGCC---TCCCGGCGGCCCTTCCAACCCCC-----  
GTGCCTTGTCCGGAC-----GCC-TC-CG-----CCGGG-----  
GCGTGCGGGGG-CGGGGCTCCGCC---AGGCC---ACGGT-GCCCC-GGCGGGCGGC-CCGC-GG-----  
GACGCC--GCGGTGTC-GCCCCCGAT-----GCGCGCTCC-----  
CCCCTGGGTCGTT-----CCCCCCTCCATG-CCGCG-----CCGGCGAGGCC-  
GGCCCG-----  
CGGGGGCGCCCGCGGGGGCGCC-----  
-----

-----  
ACCG-----  
-----  
-----  
GGCGCGCCGGCGCCCCCT-GCAGGACCCC--GC---GGG---CCGCCGGCTCGTGCCCC-TCCCT-----  
CCCCGCCCGCTTCCCGTCCCCGTCCGCCGCCCGCCCCGCCCGGCC-----  
-----

-----  
GCGT-----  
GGCGCCGGGGCGGGGGCGGGCGGGCGGGCGGGCGGGCGTGCCTGGGCGGCGCTGCTGC-  
CCGCGCCCTCCGGC--ACGCGTCCCTCTCCGTGTCGCGC-----  
GCTCTCTTCTTCC-----GC--GCGGGCCCCCTGGCGTT-  
GACGATCGC--GTGGCCGGCCTCCCGTGAGCGCGGGCGCTCGC-  
GCGGGCGGCGGGCGGCGTTGGCGAGCGAGAAGACCCTCGTCGGGCTCCCGGTAGGGGGTGGGCGCGGGCGCGCGG  
CGGCGCCCGGCCGCGCCCGGTGTGTCGTCGGCCGCGGGTGGGGGGCGCCCCGCGGCCCTCCCCGAGC-----  
-----GCGCCGCC-----  
GGCGCCGTGTGCGCCGCTTCCCCCCCCCTCCGGTCTCCGCCGTCGCCGTTCCGCCTCGCGCGGCGCCGCCCG  
GGAGCCGGGCCCCACGCCTTCCCGGCTCTCCGC-TCCCTCCGAGAC---GC-GACCTCAGATCAG

Procavis  
TCAAT--CGCCGCCCT-CGGGG-----TGGC-  
CCGGCCG-----  
-----AGGGCTGGCCTCCCGCCGGGGTGT--GCG-  
CGGCT-GGGGGTTC--  
CCTCGAGGGCCCCCGCGTCTC-----  
-----

-----  
GCGGCCGAGGCGGAGCCCTCCGTCCCCCTAAGGGCAGATC-----  
CGGCGCCTCCGTCCGGCCCCACCTCGCGCGTCGCCTCGCTACCGCCCCCGCCCGCCCCCGCGGGCGGTCGC  
CCCC-----  
-----  
-----

-----  
CGGGCGGCGGGTGTGCGGGCGGGTGGCGGGGGGGCGGAGGCGTCCGTGCGGGGTGGGGCGGGCGTGGGGCCG  
TCG-----TGCCCCGCGCGTCCGGAGGAGCGCGCG-----CGGAGA-----

GCTCGCG---  
CTGGGGCCGCTGCC-----  
-----  
-----  
GCGGCCGAGGGGTGTAGGGCTTAGTTAGCCCGCCTCTCGCGCCGCAA---CG----CGGCC-----  
CGGG-----GTCGCCCT-----GGCGTTGTGTCCGGGAGGGGGCGGGC-GGCGCGTGGTCGGGG-  
GTCTGTGCC----  
GCGGGGGGGGTGCGTCCGGGCGTTCACGGGTGCGCGGGCGGGGACCGGGAGGGGCCGGGAGGGGGCGGAGGCGAG  
GCNNNNNNNNNNNN-----  
-----

-----  
NNNNNNNNNGTCCGTCGCTCCACCGCCGCGCGTCCGGGGACCG-----CCGGCCTCCCCCGGGGCCTC-  
TCTCCCGGCCGCTTTCCCCCGCCTTCTCCCCGCCTTGTCGGGGA---CGGC-TC-CGCC-----  
CCGAGA-----GCGTGACGG-GAGGGGTGCCGCGCCCC---AGGTCT---ACGGGT-GCCCC-  
GGCGGGCGGA-CCGC-GG-----GACGCC--GCGGTGTC-GCCGGCCGAC-----  
GCGCGCCTGGCTCCGACCAACCCCCCGTGGGT-----  
CGCGGCCCAACCCCCCGCGCCGCCACGCG-----CCGGCGAGGCTC-GACCCGG-----  
CGGGGGCGTCG-----  
-----

CCG-----  
-----  
-----

CGGCGCCCC-CGCAGGACCC-----GGGAA--CCGCCGGCTCGTGGCCCCCTCCCCCT----  
GCCGCTCGCCGCGACCCCGCCCTGTCCCCGGCCGCCCGACCCGGCCGCC-  
TTCCCCGCCCGCCCGCCCGCCG-----  
CCCGT-----  
GCGGCGGGCGGGAGGGCGCGTGGGGGGCGGGCAAGAGGGGTGCGGGAGGGCCCCGGGGCCGGTCGCGGGGCGGC  
GGCGGCGGCGGCGGCGCCGCGCCGCGGCC--CCGGCGCG-TCCCCTCTCGGCGTCCG-----  
GCTCTCTTCCCTCGGCC-----TCG----CGGGGCT-CTGGC-CGTC-----  
CGGGCGTTGGCGATCGCGTGGCTCGGGCCCTCTCC-----  
-----  
-----

GTCCCCTCGACGGGGCCCGCCGCCCCCAACGCCTTCCCCGCTC-TTCCCCCTCCGAGAC---GC-  
GACCTCAGATCAG

Pteropus

TCAAT--

CGCACCCAC-----  
-----

-----GGGT---GCG-CGGTT-GGGGGTTG--

TCTCGAGGGGCCCGCGCCGTCGCCG-----  
-----

CCGGGGCCCTCCGTCCCCCTAAGTGCAGATC-----

CGGCGGTTCCCCCGCGGCG-----  
-----







CCGGCTGCCCCCTCCGTCTGCGCGGCTCCCCCGCTCC-GGTGGCC--GGGCAGGGCCCCCTTGC--CGCCG---  
CCGCCGGCTCGTGCTCCCTC-----  
GCCC-----

-----GGGGTCCCCCCCCGGGGGGCCCC-----  
GTCGCCTCTCGTCCTTGGCTCTCTCTCC--CGGCC-----TCG---CGGCG--  
ACTCCCGCGC-----

-----GCGCGCGCGCGCGCGCGCCCTCCGAGAC---GC-GACCTCAGATCAG

Felis

TCAAT--CGCCTCCCC-CGGG-----

TGGGTG-----

-----TCTCTCCCGGGGGTA-

AGGCG-TGGCT-GGGGGTTC--

CCTCGCAGGGCCCCGCCCGCGGCGTCCGCCCCGCCGAGGGCGCCCCGCCACGCCCGCCTGCGCGGCGGTACGG  
TGTGCGGGGTCGTCTGCGGGCCGGGAGAGGGTCGTCTGGCCGCTGGGCCCTCCGTCCCCCTAAGTGCAGACGA  
-----

CGGTGGCCGCCGCTGCCGCCCTCCCTCCTCCTCCTCCTCCCCCTCCCCGCCCCCTCCCCGGCCCCGTGTG-  
---

TCCGGTCCCCGCCGCTCCCTCAGCCCCCCCCCCCCGCCCGCCTCGCCCCGCCGGTCCGCT-----

CGGCGGTGGCGTGTGTGTGGGACGGGGGAGGGTGTGGGACGGGGGGGGCTGGGGGCCGGCGCCCGTGGGGCGG  
TGGTGTGGGGGGGTGTTGGGGGGGAAAGGTGTTGGGGGGGAGAGGCTGAGGCAGGCCGGTCCGC-----  
-----GCCCGCAGAAAAGGGAAGGGC-----GAGGAGA-----GCTCGCG--

CCTGAGG--GC-

CGCGGCC-----

-----GCCGCCG-CGGTC---CCTCT-GGGGGAGAT----

CCTCGTGCCGCA---CG---CGGTCTT-----TGGGG---ATCGCCACC-----CGGGTCT-----

CGGGA-GGGCTTTGCGGTGCCCC--GTGCCGCGCGTCCCGTGGGCCGTC---

GTGGGGGGTGGAGGTTGTGGATCCGGAGCGCCGTTGGTCTC-----

GCCGCT-----

TGCCCC-----

GGGCGGCGGCCGCG-----

CGGTCTGGCCGTGGCCCCCTCCTCTCCCGTCTGTGGCCGTGCGTCCGGGGCCCCGA-----

GCCCGGCCCCCGCCCGCTCCCCGCTGGCGA-TCCC--GGCCCCCTTTTGCCTGTGCGGGC-----GGC-

TCGCGCC-GAGG-----CCGAGTC-----GCGC--GCGGGGCTGCGCCCC---

GGGG-----ATGCGT-GCCCC-GGTGG-CGGC-CCGC-GG-----GACGCC--GCGGCGTC-

GCCCCCGCT-----GCGCGCTTCCC-----CCCGGT-----

TGCGGCCGCG-CCGCACTG-----CGTG-----CCCCGAGCCCGC-GTTG--  
TCGCGGGGGGGTGTGGTTCTCCGCGGGGGTTTTCGTTGGTTGGAGGCGTGCCGCGCCGTCCGCCGGGCCCGGCC  
CGGGGCCGCGGGAG-----  
CGCGGGGCACGTGGGACGTGTGGGGGGAAGGCCGGGTGTGTCG-----  
-----GTGGGGGAAA-----AGGGCCGGCGGTGCG-GGGG-  
CGACCGCCG-----  
CGCTTGGACCCCCACGCCCCGCGCCCGTTCTCCCCTCGCTCCCCGCCCCGCGCCGCTCGCCGCGGTTCCCC  
CTCCGGGGTTCGTCGCGAGGCGGCGCGTCCCGCGCCCCGCCCCTGCCAAACCCCCGTTCTCCGCCCCCTCCGC  
-CTTCAAACCCCGCAGGGCTCCC-GCC-TGTG----CCGCCGGCCCGTGTCTCCGCCT-----  
GCCCCCGCGTGTTCGCTGGCCGTCCCGCGTGCACACCTTACCTTCCCCGTCCCCCTCCCCCTCCCGGCTCT  
CTCCCCTCCCGCGCGTCTCGCTTCCCTCTCCCTCCCTCCCTCGCGGAGGGTTTGGAGGAGGGGGGTTGTTGGT  
GCGTTGCGGGGAGGGGGGGTGTGCGTTGTGGGGGGTGGCGGCTCGGGCGTTGTGTTGGGGTTTTGCGTGT  
TGGGTGTGCGCCGAGAACCAGGGCGGTTGCGGAGCGCGCCTTCCCCGGGGCCGGC-----  
GTTCCGGTCTCTCGTCGCCCTCCGCCCTG-----GCCTCG----CGGG-G--  
CTCCTCTGGCGCGC-----  
-----  
-----  
-----  
-----CGCGCGT-CCCTCCGAGAC--GC-GACCTCAGATCAG

Equus

TCAAT--CGCCCC---CGGGG-----  
TGGGTGTCG-----  
-----CCTGCCCGGGGT-----  
GCG-CGGCT-GGGGGTC---  
TCTCGCAGGGCCCGCC-----  
-----  
CCGGGCCCTCCGTCCCCCTAAGTGCAGACG-----CGGTGCCCTCCTCC----  
GCCCCGCGCGCCCCGCCCTCCTCCCACGCGCCCC-----  
-----  
-----  
-----  
GGCGCCCGTTCGTCGAGGCGCGTGGGGTTCGGTGGCGGCGGCGCCGCGGGTCCCGGGGTGGGGGCCGCC----  
-----GCCCGCGAGTCGAGGGAGAGGAGCAG---ACG-----CGAGA-----  
GCTCGCG---  
CCGAGGTGCCCGTGGCCGCC-----  
-----  
-----ACGGTG-----  
CCTTCGGG--GGC---TCCCTCGCGCCGCA----CG----CGG-CCT-----CGGGGT-----  
GGCCGGGGC-----GGGGACGAGACGGGTCCCGCGGCGCGTGGTTCGGGGCCGCCGTG-----  
TCGGGGGGCCCGCGTCCGGGCCGCTG--TCCGGTC-----  
GCCGC-----  
-----  
TCGCCCC-----



-----  
GTCGGCGGTCCGTCCCGGTGCGTCCGGCCGGCCCTCGCCGGTCCCCGGCGCGCC- GGGTCCCGGACC---  
GTGACCCCTCCCCGGCC-----TCGCC-----CCGTGCGGG-----T-GGC-TCGCGCC-  
GAGG-----CCGAGTC-----GCGTGCGCGGGGCCCGCCCC---GGG-----  
ACGCGT-GCCCC-GGCGG-TGAC-CCGC-GG-----GACGCC--GCGGCGTC-GTCCGCCACC-----  
GCGCGCCCTCC-----CCCGGGT-----CGCGGCCGCG-CCGCGCTG-----  
CGTG-----CCCCGAGCC-CC--  
GGGCGGGCGGGCGGGCGCCGCTCCGCCGCCGACGGGCCGTGGCGGCTCGCGGCGGAGGGGCGGGTGTCTGGGAG  
GCGGTGGGACGCGCGCGGGAGGTC-----

-----  
--GGCGGTTCG-GGGG-  
CGAGCGCCGG-----

-----  
CCCCGCCGCGCCCGCCGCCCTCCGCGTCTCCTCCCCGCGTCCCGCGACGCGTCCGCCGTGCGCGTGGC  
GGCGTCCCGTCCGCCCTCCT-----CCCCGGCGGGGCCCTCGC-CCGTG-----  
CCGCCGGCTCGTCCCCCGTCC-----  
GCCCGCCCGCTCCCTCCGCCCGCCCGCCCGCCCTC-----

-----  
CTTC-----  
GGGGGTTCGTTCGTGGCGGGGGCGGGCGGAAGGCCGGCGGACG--TCGGCCGTGGCCTC--GCGCGCC---  
CGGGGTCC--TCCTCCGCGGC-----GTTTCGTCTCTCCGTGCTCCC-CCGCC-----  
TCGCTCG---CGGGCTTCCC-----  
GCGCGCGGCGG-----

-----  
----CCGCCCGCCGCCCGCCGCGCCCTCCGAGAC--GC-GACCTCAGATCAG

Sus

TCAAT--CGCCACCCC-CGGGG-----  
TGT-----

-----TTCCCTCTCC-GGGGGT---

GGCG-CGGCT-GGGG--TGT-  
CCTCGCAGGGCCCGCT-----

-----  
GTGCCCTTCGTCCCCCTAAGTGCAGACAC-----TGGCGCGCCCTCT--  
GCCTCCTGCCGTATCTGCCCCGCACCCACCCCCCCCCACGCCCTGCCCCGCGCCCGCTCGC-----

-----  
TTGACGGAGCGGTGTGGGACGGTGGGGTGGGTGGCTGGGGGCGGGCGGCGGCGGCTGCGAGGCCTTGGGGGGG  
CGCGCGCC-----GCCCGTGAAGAGGAAGAGACGGACC-----  
AGAGG-----G-TCGCG---CCGAGGCCGT--  
TGGCCTTGG-----

-----  
-----CCGCCGCCGC-----CCTTT-GGG--AGC---  
CTCCTCGCGCCGCA---AG---CGGTCTTT-----TGGGCAT-GGTGTGTTTC---GCCGGGGG-----  
TGGGGTGGGGGCGTCGGGCCGAGTCCCC-GCGCCG-CGCGGCCGGAGCCCCGCG-  
CGATATCGGTCTGGGGGTCTGAGTCCGGGCCGCCGCCCTCCCCTTTGCCGCG-----  
-----

-----  
CGCCCCAA-----  
CGCGGCCGGCGGT-----GGCGGCCGT-----  
GTCCGGCCGGCTCCCTGCCGCGTCCGCCGCGCCGCTGGGGTTCC-  
TTCCGCGCCCCGCGCCCCCCCCAAACAA-CG-CCTC--GCCCTGTCGGGGCGGGC-GGC-TCGCCCC-  
GAGG-----CCGTGTC-----GCGCGCGTGG--CCGCGCCCC--GGG-----  
ATGCGT-GCCCC-GGTGG-TGGC-CCGC-GG----GACGCC--GCGGTGCCTTCCGCCGC-----  
GCGCGCTTCCC-----CCCGGGC-----TGTGGCCGCG-----CGGTGCCT--  
CGTG-----CCCCGAGCCC-----  
GCGGGTTTTGGTGTCTCCAGGGGTTGGGCGCCCGGCTTCCAGCCACCCGTCGGTCGTGGGGCGTCTTGGCC  
GCACACGCGCGTGAGGTTGCGT-----  
-----

GGAGGGAGAGAGGGGGAGGCAGGGGGGGCCCCTGGCGGTCG-  
GGGGGCGACCGCCGGTTTTT-----  
-----

CTTCTCGTTGCTCCCTCGCCTGCCGCCCTCCTCCTCCTGCGCCTGTCTCCGCGCCGCGGCGCGTGCCTCCCC  
CGGCCGGTGGGGTCTCTCGGCCTGGTCTGCTGTTGTGCGCCTTCCCTGCCGCGCCCCGCCCC-  
GCCCGCCCGTCC-----CCGTGC---  
CCGCCGGCTCGTGCTTCCCCGTGCCGCCCGCCGTCTGTGTTCCCTTCTGCCTCCCACCCCGGCGCCTCCCCCCC  
GC-----  
-----

TTGA-----  
-----GCGGGTGGGGGCGGGGTGGGGTGGGG-TGGGGAGCCAGGCGGGTGGAGGCT-  
GGACCGGGGGTCTCGTCTCGCGCGTG-----GCTCTCGTACCGTGTCCC-----CTTCCCACC-----  
TGG---CGGGT-GCCCTGTTCCCC-  
GCGCGTGGGCGAGCGAGCGAGCGAGCGAGCGAGGGGGAGCCGATCGGGC-----  
-----

-----TG-  
TCCGCGCCCGTGTCCCATCTGTCCCGTCCCGCCCGCCCGCCCGCTTCCGCTCCGC--CCCTCCGAGAC---GC-  
GACCTCAGATCAG

Tursiops

TCAAT--CGCCCCC--CGGGG-----  
TGTGTGTGCGC-----  
-----

-----GCGCGCGCGCCTTCCC-GGGGGT---  
GGCG-CGGCT-GGGGGTTT--  
GCTCGCAGGGCCGCCG-----  
-----

GGGCCCTCCGTCCCCCTAAGTGCAGACG-----





GCCCCCGCTGCGCGCGCGCGCGC-----  
-----  
-----  
-----  
-----GCGCCCTCCGAGAC---GC-GACCTCAGATCAG

BubaIus

TCAAT--CGCCCCTC--CGGGG-----  
TGCGCGTGTCC-----  
-----CGTGCGCGCCTCCCCGGGGGGC----  
GCG-TGGCT-GGGGGCTGT-  
CCTCGCAGGGCCTC-----  
-----  
GGGGCCCTCCGTCCCCCTAAGTGCAGACA-----CGGCGTCCCCCCCCC-  
GCCTCT-----  
-----  
-----

GTGGCCCGGGGGGACGTC-----GCCCGCGAGAGGGGAGAA--  
GGGGA-----CGAGA-----GCTCCGG--CTGAGGCCCC--  
TGGCCTGCCGG-----  
-----GCCTCCGGGGTCCGGTCTCTCCCCTTTGAG--AGCG---  
TCCTCGCGCCGCA---AG---CGGCCTT-----CGGGT---GTCACTGCCCC---TGGGGTGTCCGGG-  
GCTGGGGATGGTCTC-----GCGCCACG-CGGCGGGGGCCCGCGGTGGTGGCGG--  
GTGGGGTGGGGTCCGTCCTCCGGTCCGCCGTC-GTT---  
CGCCGTCCCCGC-----  
-----

CTC-----  
GGCGGCGGTGTTTCCCGGCGCCCGGCCGCGCGGCC-----  
-----  
-----NNNNNNNNNNNC-  
GCGCCCC---GGGG-----ACGCGT-GCCCC-GGCGG-CGAC-CCGC-GG-----GACGCC--  
GCGGCGTCTGCCCGCCGCT-----GCGCGCTCTCC-----CCCCGGC-----  
TGCGGCCGTG-CCG---CGGT-----TCGCG-----CCCCGGCGTCTCGCCGC---GAGGGC-  
GTGGTCCGGTGGCGGCGGTGGCGGA-----GCGGAGGGGAT-GTC-----GGGAGGGGGC-----  
GCGCGTTGCGTCCGTCGCC-----  
-----

---  
GTTC-----  
-----  
-----GGGCTTCGGCGCCCGTGCCTGCCCGACCCTTCTTCCCCCCCCGCCCGCGGCCACCTCG---  
CCGCCGGCCCCCGCCCC---GTCC--GTCCCGTGG---CCGCCGGCTCGTGCTCCCC-----  
GCCCCGCCCCGCCTCGGCGTCTCCCTCTGTCCGC-

CGCCCGCGGCCGCTGCCGCC-----  
--GCCGCGCCGCGCCTCCTCCTCCCGGAGGG-  
GCGACGGG-----  
TAGGCGGTGGTCGGTAG--GGTGCTGTGTGGGTGCGTGGGCAAGGGGGGGCCC--GGGGGG--GCGG-  
TCGGCCGCGG-----GTCTCTCCGTCCCCCTTCTCGGGACCCTC-----CTCG-----  
CGGGC-  
GCCCTCGCTGCGCGTGCGCGTGC-----  
-----  
-----  
-----  
-----GCGCGCCCTCCGAGAC---GC-GACCTCAGATCAG

Sorex

TCAAT--CGCCCCCGCGGGG-----  
TGCCC-----  
-----GCACTCCGCGGGGGC-----  
GCG-CGGCT-  
GGGGGTTTCCTCTCGCAGGGCCCCGCGGCC-----  
-----  
TTCCCGGTGCGGGTGTCCCTCCGTCCCCCTAAGTGCAGACGAGAGA-  
CG-----  
-----  
-----  
-----  
-----GCCAT-----  
CCCGCCGAGAGCGGGGTGGAGAGCA-----CGGAGC-----G-  
TCGCGCCGCGAGGTGCC--  
CGCGGCCGCC-----  
-----  
-----ACGGTGCGTCC---CGGTC-----CCTTCGGGGGTCTGA---  
TCCTCGCGCCGCA---CG---CGGCCGTCC---GGCGGGGCGGGTTCGGGGGCTTCCGCGGGTGTTC--  
GCCGGGGACGGACCGCGTCCGGCCCCCGTGCCTGCGCGCGGTCACCCTCCCTCCCTCCCC-----  
-----  
-----  
TCCGC-----  
-----  
GGGGAGAAGGGAGGGGGGGCCCGCGCGCGAG-TGCCCCCGTTCCCC-----  
GCCTGCGGTGCGTCC--GCCGGCCCCGGCTCGTGGCCCCGAGAGGA---  
CCCAGTCAGCC-----GCGCGTGCGGTCTCACGTTCCC-GGGGAGGGACGCGT-  
GCCACCGACGGGCGAC-CCGC-GG----GACGCC--GCGGTGCCCGCCCGCGTC-----  
GCGCGTCTCT-----CCCCTCCCGGT-----CGCGGTGATC-CCGC-----  
CGCG-----CGGAGCGGGTCTCCTGACCCCTCGGGTTCGCGGCGCCGGGGTGTTCGG-CC-  
CGGCCGC--  
GCCT-----







-----GCTC---TCCTTCCCCCCCC-----  
CCCCCCCCCCTCCCCGCGTCCGG-----CCGGAGCGTCAGCC-----  
GGGGCCCC--GGGG--CCCAC-GGTGGTTGCCT--GCGGGTTCGCTGGGC--ACGGCGCT--  
TCCGCCGCGA-----TG-TGGGTCT-----TCCCGGTCCG-----  
GACACCCCGCCGTTCCGGGCGATCCGGATCGCGCGGGTTCGGCGGGGGGG-----

-----CACGTTCC-----  
TCCCCGCCG-----CCGAGGGAGCCCCCCCC--  
GCTCCCTCGTCGGGGCGCTCGTCCTCCTTCCGAACCTTCCCCTCGTTTTCT-----

-----TCTC-GAGAGCGTGC-GACCTCAGATCAG

Monodelphis

TCAAT--CGCCCGTTCCC--GTTTCC--  
CCCGGTACCCCTTCCGCCTCCCCCATCCCCGCCAAGCCGTTGTCGCTCGCGAGGAGGATCCGCGGTGGATCCT  
GAGGGCGCCCGCGCTTTGGAGCTGGGGGGGGGTTTCGCGGTTCGGGTTTTCCGGGTCTCGGGGGCGTGGGGCG  
-CGGCT-GGGGGTC----  
ATCGCAGGGTCCC GCCACGCCAGAGG-----

CCAAAGGGTGGCCGGGGCCCTCCGTCCCCTGAAGTGCAGACG-----  
GT-----

-----GGC-  
GAAAAGATGAAGCGAGAAGGGCCGCCGCGTG-----GCGGAG-----  
CTCGCCCCC-----

---CTTGGGG-----ACCTCGCGCCCTC--TGCGGG--

CGGCGTCTGGACCCGCCGGCGTGCGGTGCGGTGTGTCGCGTGGGGTTTTGGGTACGCTGTCCCGGACCACCGGG  
CGCTTTCCC-----

-----GCTCCCCTCCTTCCCCCGCCGCTCGTCGTCGGGCGGG--CCCCCT---TCCCGTCGG-  
CCGG-----ACGGAGCGCCTGTC-----GGGGCCC-----GGC-  
CCCGC-GGCGGTTGCCT--GT-GGT-CGCTGAAC---ACGGTGCT--TCCGC-GCGG-----  
TTGTTGGGG-----CCCGGGT-GG-----GACACCCCGACCGTTCCGC---TCCGTGCCGAGCGGG-  
TCGG-----

---AGCCGC-TGGCACGT-CGGT-----TTCCCGCCTGA--CTCGTTGC-----  
CGGGCGCGCAGAGCT---  
CGGAGTTCTCCCTTCCTCGCGTGCCGCCTTCCCTCT-----  
CTCCCACCCTT-----

-----TGGGGTGGGGGTTCCCTCCTCTGTGAT--GC-GACCTCAGATCAG

;  
end;
